# Supplementary material for: Association between normal tension glaucoma and the risk of Alzheimer’s disease: a nationwide population-based cohort study in Taiwan
Source: PubMed Central journal article supplement — BMJ Open. 2018 Nov 5;8(11):e022987. doi: 10.1136/bmjopen-2018-022987 (PMC6231573; doi:10.1136/bmjopen-2018-022987), 2018-11-05
Supplement: bmjopen-2018-022987.draft_revisions.pdf [file bmjopen-2018-022987.draft_revisions.pdf]

# BMJ Open

BMJ Open is committed to open peer review. As part of this commitment we make the peer review history of every article we publish publicly available.

When an article is published we post the peer reviewers' comments and the authors' responses online. We also post the versions of the paper that were used during peer review. These are the versions that the peer review comments apply to.

The versions of the paper that follow are the versions that were submitted during the peer review process. They are not the versions of record or the final published versions. They should not be cited or distributed as the published version of this manuscript.

BMJ Open is an open access journal and the full, final, typeset and author-corrected version of record of the manuscript is available on our site with no access controls, subscription charges or pay-per-view fees (<http://bmjopen.bmj.com>).

If you have any questions on BMJ Open's open peer review process please email [info.bmjopen@bmj.com](mailto:info.bmjopen@bmj.com)

# BMJ Open

## The Association between Normal Tension Glaucoma and the Risk of Alzheimer's Disease: A Nationwide Population-based Cohort study

|                               |                                                                                                                                                                                                                                                                                                                                                                                                                                                                                                                                                                                                                                                                        |
|-------------------------------|------------------------------------------------------------------------------------------------------------------------------------------------------------------------------------------------------------------------------------------------------------------------------------------------------------------------------------------------------------------------------------------------------------------------------------------------------------------------------------------------------------------------------------------------------------------------------------------------------------------------------------------------------------------------|
| Journal:                      | <i>BMJ Open</i>                                                                                                                                                                                                                                                                                                                                                                                                                                                                                                                                                                                                                                                        |
| Manuscript ID                 | bmjopen-2018-022987                                                                                                                                                                                                                                                                                                                                                                                                                                                                                                                                                                                                                                                    |
| Article Type:                 | Research                                                                                                                                                                                                                                                                                                                                                                                                                                                                                                                                                                                                                                                               |
| Date Submitted by the Author: | 17-Mar-2018                                                                                                                                                                                                                                                                                                                                                                                                                                                                                                                                                                                                                                                            |
| Complete List of Authors:     | CHEN, YU-YEN; Taichung Veterans General Hospital, Department of Ophthalmology<br>Lai, Yun-ju; Puli Branch of Taichung Veterans General Hospital, Department of Internal Medicine<br>Yen, Yong-Fong ; Taipei City Hospital, Section of Infectious Diseases<br>Shen, Ying-Cheng; Taichung Veterans General Hospital, Department of Ophthalmology<br>Wang, Chun-Yuan; Taichung Veterans General Hospital, Department of Ophthalmology<br>Liang, Chiao-Ying; Taichung Veterans General Hospital, Department of Ophthalmology<br>Lin, Keng-Hung ; Taichung Veterans General Hospital, Department of Ophthalmology<br>Fan, Lir-Wan; University of Mississippi Medical Center |
| Keywords:                     | normal tension glaucoma, Alzheimer's disease, risk factors, National Health Insurance Research Database, cohort study                                                                                                                                                                                                                                                                                                                                                                                                                                                                                                                                                  |
|                               |                                                                                                                                                                                                                                                                                                                                                                                                                                                                                                                                                                                                                                                                        |

SCHOLARONE™  
Manuscripts

1  
2  
3  
4 **The Association between Normal Tension Glaucoma and the**  
5  
6 **Risk of Alzheimer's Disease: A Nationwide Population-based**  
7  
8 **Cohort study**  
9  
10

11  
12  
13 Yu-Yen Chen,<sup>1,2,3</sup> Yun-Ju Lai,<sup>2,4,5</sup> Yong-Fong Yen,<sup>2,6</sup> Ying-Cheng Shen,<sup>1</sup>

14  
15 Chun-Yuan Wang,<sup>1</sup> Chiao-Ying Liang,<sup>1</sup> Keng-Hung Lin,<sup>1</sup> Lir-Wan Fan<sup>7\*</sup>  
16  
17

18  
19 <sup>1</sup>Department of Ophthalmology, Taichung Veterans General Hospital, Taichung,  
20  
21 Taiwan.  
22

23  
24 <sup>2</sup>School of Medicine, National Yang-Ming University, Taipei, Taiwan.  
25

26  
27 <sup>3</sup>Community Medicine Research Center and Institute of Public Health, National  
28  
29 Yang-Ming University, Taipei, Taiwan.

30  
31 <sup>4</sup>Division of Endocrinology and Metabolism, Department of Internal Medicine, Puli  
32  
33 Branch of Taichung Veterans General Hospital, Nantou, Taiwan

34  
35 <sup>5</sup>Department of Exercise Health Science, National Taiwan University of Sport,  
36  
37 Taichung, Taiwan

38  
39 <sup>5</sup>Department of Exercise Health Science, National Taiwan University of Sport,  
40  
41 Taichung, Taiwan

42  
43 <sup>6</sup>Section of Infectious Diseases, Taipei City Hospital, Taipei City Government, Taipei, Taiwan

44  
45 <sup>7</sup>Department of Pediatrics; Division of Newborn Medicine, University of Mississippi  
46  
47 Medical Center, Mississippi, USA  
48  
49

50 **\*Correspondence to:**

51 **Yu-Yen Chen, MD., Ph.D.**

52  
53 Department of Ophthalmology, Taichung Veterans General Hospital, Taichung, Taiwan.  
54  
55 1650 Taiwan Boulevard Sect. 4, Taichung, Taiwan 40705  
56  
57  
58  
59  
60

1  
2  
3 Tel : 886-4-23592525 press 9

4 Fax : 886-4-23595046

5  
6 E-mail address: yuyenchen.phd@gmail.com

7  
8  
9 **Word count:** 2266

#### 10 **Author Contributors**

11 Conceptualization: YYC, YJL, YFY, YCS, and LWF; Formal analysis: YYC, YJL, CYW and LWF; Investigation:  
12 YYC, CYW, CYL, KHL and LWF; Methodology: YYC, YJL, YFY, HYH, and YCS; Validation: YYC, YFY, and KHL;  
13 Writing the original draft: YYC, and LWF.  
14

#### 15 **Funding statement**

16 This research received no specific grant from any funding agency in the public, commercial or  
17 not-for-profit sectors.  
18

#### 19 **Competing interest**

20 None.  
21

#### 22 **Ethics approval**

23 This study has been approved by the institutional review board of National Yang-Ming University  
24 (2015A018).  
25

#### 26 **Data sharing statement**

27 Data are available from the National Health Insurance Research Database (NHIRD) published by  
28 Taiwan National Health Insurance (NHI) Bureau. The data utilized in this study cannot be made  
29 available in the manuscript, the supplemental files, or in a public repository due to the Personal  
30 Information Protection Act executed by Taiwan's government, starting from 2012. Requests for data  
31 can be sent as a formal proposal to the NHIRD (<http://nhird.nhri.org.tw>) or by email to  
32 wt.gro.irhn@drihn.  
33  
34  
35  
36  
37  
38  
39  
40  
41  
42  
43  
44  
45  
46  
47  
48  
49  
50  
51  
52  
53  
54  
55  
56  
57  
58  
59  
60

# The Association between Normal Tension Glaucoma and the Risk of Alzheimer's Disease: A Nationwide Population-based Cohort study

## Abstract

**Objectives:** To investigate a possible association between normal tension glaucoma (NTG) and an increased risk of developing Alzheimer's disease (AD).

**Design:** Retrospective cohort study.

**Setting:** NTG group and the comparison group were retrieved from the whole population of the Taiwan National Health Insurance Research Database (NHIRD) from January 1, 2001, to December 31, 2013.

**Participants:** A total of 15,317 subjects with NTG were enrolled in the NTG group, and 61,268 age- and gender-matched subjects without glaucoma were enrolled in the comparison group.

**Primary and secondary outcome measures:** Kaplan-Meier curves were generated to compare the cumulative hazard of AD between the two groups. A multivariable Cox regression analysis was used to estimate the adjusted hazard ratios (HRs) of AD, adjusted for diabetes, hypertension, hyperlipidemia, coronary artery disease, and stroke. Furthermore, risks factors for developing AD among the NTG group were investigated.

**Results:** The mean age of the cohort was 62.1±12.5 years. NTG patients had significantly higher proportions of diabetes, hypertension, hyperlipidemia, coronary artery disease, and stroke than the comparisons. NTG patients had a significantly

1  
2  
3 higher cumulative hazard for AD than the comparisons ( $p<0.0001$ ). In the  
4  
5 multivariable Cox regression after adjustment for confounders, the NTG group had a  
6  
7 significantly higher risk of AD (adjusted HR=1.52; 95% CI: 1.41 to 1.63). Moreover, in  
8  
9 the NTG group, when we compared the effects of different types of glaucoma eye  
10  
11 drops, none of the eye drops used were significant risk factors or protective factors  
12  
13 for AD.  
14

15  
16 **Conclusions:** People with NTG are at a significantly greater risk of developing AD  
17  
18 compared with individuals without glaucoma. Among NTG patients, none of the  
19  
20 glaucoma eye drops used significantly changed the risk of subsequent AD.  
21  
22

23  
24  
25 Keywords: normal tension glaucoma, Alzheimer's disease, risk factors, National  
26  
27 Health Insurance Research Database, cohort study  
28  
29

## 30 31 **Article Summary**

### 32 33 34 **Strengths and limitations of this study**

- 35  
36 ● The study utilized the comprehensive, whole national population database with  
37  
38 a long study period to investigate the relationship between normal tension  
39  
40 glaucoma and Alzheimer's disease.
- 41  
42 ● The cohort study design and survival analysis would elucidate the association  
43  
44 between normal tension glaucoma and subsequent risk of developing  
45  
46 Alzheimer's disease.
- 47  
48 ● The diagnoses in the study were based on the generally accepted diagnosis  
49  
50 classification system and were confirmed by psychiatrist/neurologist and the  
51  
52 National Health Administration.
- 53  
54 ● Possible confounders were adjusted in the Cox regression to derive the more  
55  
56  
57  
58  
59  
60

1  
2  
3  
4  
5  
6  
7  
8  
9  
10  
11  
12  
13  
14  
15  
16  
17  
18  
19  
20  
21  
22  
23  
24  
25  
26  
27  
28  
29  
30  
31  
32  
33  
34  
35  
36  
37  
38  
39  
40  
41  
42  
43  
44  
45  
46  
47  
48  
49  
50  
51  
52  
53  
54  
55  
56  
57  
58  
59  
60

real correlation between normal tension glaucoma and Alzheimer’s disease.

For peer review only

## Introduction

Glaucoma is a chronic, progressive disease with characteristics of retinal ganglion cell loss, retinal nerve fiber layer (RNFL) thinning, and optic nerve atrophy.<sup>1-3</sup> Elevated intraocular pressure (IOP) plays an important role in the development of glaucomatous optic neuropathy. However, 30 to 92 percent of primary open-angle glaucoma (POAG) have IOP within the normal range and are classified as normal tension glaucoma (NTG).<sup>2, 4-7</sup> NTG occurs because of a fragile optic nerve that can be damaged despite a normal IOP, or because of mechanisms other than an elevated IOP (e.g., insufficient ocular perfusion pressure or autonomic dysfunction).<sup>8-13</sup> Without treatment, NTG leads to optic nerve atrophy, progressive visual field loss and even blindness. The mainstay treatment for NTG, similar to the therapy for other types of glaucoma, is aimed at reducing IOP with glaucoma eye drops.

Alzheimer's disease (AD) is the most common form of dementia that is characterized by a progressive loss of memory and cognition and changes in personalities and behavior, as well as by an impaired ability to perform daily activities.<sup>14-15</sup> In the brains of AD patients, amyloid plaques and neurofibrillary tangles (aggregation of abnormal tau proteins) lead to gross atrophy of the brain.<sup>15</sup>

NTG and AD have common features. Both of them are chronic, progressive neurodegenerative diseases with an age-related and female-predominant incidence.<sup>16</sup> In structural and pathological studies, AD patients exhibit RGC loss and RNFL thinning, similar to NTG patients.<sup>17-20</sup> In genetic studies, the epsilon 4 allele of apolipoprotein E (APOE), which is a risk factor for late-onset AD, has been observed in the pathogenesis of NTG.<sup>21</sup> The optineurin gene has also been found to be



1  
2  
3 associated with both AD and NTG.<sup>22-23</sup> In addition, in clinical, cross-sectional studies,  
4  
5 Bayer and Tamura et al. have found an increased prevalence of glaucoma in AD  
6  
7 patients.<sup>24-26</sup> All of these may imply that glaucoma and AD share similar  
8  
9 pathophysiological or underlying mechanisms.  
10

11  
12 However, population-based cohort studies evaluating the association between  
13  
14 glaucoma and AD have revealed inconsistent findings. The  
15  
16 Three-City-Bordeaux-Alienor study conducted in France showed that open-angle  
17  
18 glaucoma (OAG) patients were four times more likely to develop dementia during  
19  
20 the 3-year period.<sup>27</sup> In a Taiwan registry study, Lin et al. also found a significantly  
21  
22 higher risk of developing AD among the POAG patients.<sup>28</sup> In contrast, there was no  
23  
24 increased risk of developing AD among the NTG patients in a Danish registry study  
25  
26 and among the POAG patients in a population-based study in Sweden.<sup>29-30</sup> The  
27  
28 discrepancies may be due to the insufficient statistical power, non-equivalent study  
29  
30 designs, and different diagnostic criteria.  
31  
32

33  
34 The objective of our study was to investigate whether patients with NTG have a  
35  
36 higher risk of developing AD than controls using the National Health Insurance  
37  
38 Research Database (NHIRD) in Taiwan. To eliminate the limitations of previous  
39  
40 studies, we utilized the whole population database; therefore, we had sufficient  
41  
42 statistical power. In addition, the NHIRD adopted the International Classification of  
43  
44 Diseases, Ninth Revision, Clinical Modification (ICD-9-CM) codes. Thus, the diagnostic  
45  
46 criteria used in our study are generally accepted worldwide.  
47  
48  
49  
50  
51  
52  
53  
54  
55  
56  
57  
58  
59  
60

## Materials and Methods

### Data source

The National Health Insurance (NHI) program of Taiwan covers the healthcare services of greater than 99% of Taiwan's 23 million residents. The NHIRD is maintained by the National Health Research Institutes of Taiwan and includes inpatient and outpatient medical benefit claims. To ensure confidentiality, the identification of all patients in the database was encrypted prior to releasing data for research purposes. Therefore, according to the rules of the Institutional Review Board, written informed consent was waived. Based on the healthcare claims of the entire population, we sought to compare the hazard of AD in subjects with and without NTG during the 13-year period. This study was approved by the ethical committee of Yang-Ming University Hospital (2015A018).

### Patient involvement

Patients were not directly involved in the design of this study.

### Inclusion and exclusion criteria

Using the Taiwan NHIRD from 1996 to 2013, we performed a retrospective cohort study. We first selected patients with NTG (ICD-9-CM codes 365.12) from January 1, 2001, to December 31, 2013. Patients with NTG diagnoses from January 1, 1996, to December 31, 2000, were excluded to ensure that our NTG patients were newly diagnosed. The date of the first NTG claim was defined as the index date. Those who had never received a diagnosis of glaucoma were randomly selected as a comparison group at a ratio of 1:4 and matched with the NTG group on age, gender, and index year (the year of the index date or enrollment). The two groups were followed up to see whether they developed subsequent AD. Follow-up time was calculated from the index date (enrollment date) to the date of AD diagnosis, death,

1  
2  
3 or the end of 2013, whichever occurred first. The diagnosis of AD (ICD-9-CM codes:  
4 331.0) was confirmed by neurologists or psychiatrists through a well-acknowledged,  
5 standard diagnostic protocol. Subjects who received a diagnosis of AD or dementia  
6 before the index date or enrollment were excluded to ensure that the occurrence of  
7 AD was newly diagnosed.  
8  
9  
10  
11  
12  
13  
14  
15

### 16 **Statistical analysis**

17  
18 After investigating the two groups descriptively by age, gender, and  
19 comorbidities, the group differences were analyzed by the two-sample t-test (for  
20 continuous variables) and chi-square test (for categorical variables). Survival analysis  
21 using the Kaplan-Meier method with the log-rank test was applied to describe and  
22 compare the cumulative incidence curves of AD. A Cox proportional hazard model  
23 was used to estimate the hazard ratio (HR) for the occurrence of AD according to  
24 each variable in the univariate and multivariate analyses. Variables included in the  
25 regression analysis were age, gender and comorbidities, including diabetes,  
26 hypertension, hyperlipidemia, coronary artery disease, and stroke. Comorbidities  
27 were regarded as time-dependent covariates.  
28  
29  
30  
31  
32  
33  
34  
35  
36  
37  
38

39 Subsequently, we focused on the NTG group. The Cox regression was used to  
40 identify the risk factors associated with AD among NTG patients. Variables included  
41 for analysis were age, gender, comorbidities, and different types of glaucoma eye  
42 drops. Glaucoma eye drops were identified and classified by the National Drug Code  
43 and the Anatomic Therapeutic Chemical (ATC) code. According to the classification  
44 system, types of glaucoma eye drops include  $\alpha$ -agonists, parasympathomimetics  
45 (pilocarpine), carbonic anhydrase inhibitors,  $\beta$ -blockers, prostaglandin analogs, and  
46 fixed combinations. All statistical operations were performed using SAS statistical  
47 package, version 9.2 (SAS Institute, Cary, NC, USA).  
48  
49  
50  
51  
52  
53  
54  
55  
56  
57  
58  
59  
60

## Results

### Demographic characteristics of the study sample

A total of 15,317 NTG patients and 61,268 matched controls were enrolled in the study. Table 1 displays the demographics of the two groups. The mean age in both groups was 62.1 years. The NTG group had a significantly higher proportion of diabetes, hypertension, hyperlipidemia, coronary artery disease, and stroke than the comparison group. During the 13-year study period, the cumulative incidence of Alzheimer's disease was significantly higher in the NTG group (1023/15317; 6.7%) than in the comparison group (2574/61268; 4.2%).

**Table 1. Characteristics of the study subjects**

| Variable                                                | NTG group<br><i>n</i> =15317 | Comparison group<br><i>n</i> = 61268 | <i>p</i> -value |
|---------------------------------------------------------|------------------------------|--------------------------------------|-----------------|
|                                                         | <i>n</i> (%)                 | <i>n</i> (%)                         |                 |
| <b>Age, year, (mean±SD)</b>                             | 62.1±12.5                    | 62.1±12.5                            | 1.000           |
| <b>Age, categorical</b>                                 |                              |                                      | 1.000           |
| <55                                                     | 4778 (31.2)                  | 19112 (31.2)                         |                 |
| 55-65                                                   | 3889 (25.4)                  | 15556 (25.4)                         |                 |
| 65-75                                                   | 3627 (23.7)                  | 14508 (23.7)                         |                 |
| ≥75                                                     | 3023 (19.7)                  | 12092 (19.7)                         |                 |
| <b>Gender</b>                                           |                              |                                      | 1.000           |
| Male                                                    | 8372 (54.7)                  | 33488 (54.7)                         |                 |
| Female                                                  | 6945 (45.3)                  | 27780 (45.3)                         |                 |
| <b>Comorbidities</b>                                    |                              |                                      |                 |
| Diabetes                                                | 5110 (33.4)                  | 15671 (25.6)                         | <0.0001         |
| Hypertension                                            | 9148 (59.7)                  | 32790 (53.5)                         | <0.0001         |
| Hyperlipidemia                                          | 7590 (49.6)                  | 21628 (35.3)                         | <0.0001         |
| Coronary artery disease                                 | 5627 (36.7)                  | 16323 (26.6)                         | <0.0001         |
| Stroke                                                  | 1572 (10.3)                  | 6518 (10.6)                          | 0.18            |
| <b>Follow-up period, year<br/>(mean±SD)</b>             | 4.92±3.29                    | 4.96±3.27                            | 0.18            |
| <b>Occurrence of AD during<br/>the follow-up period</b> | 1023 (6.7)                   | 2574 (4.2)                           | <0.0001         |

NTG indicates normal tension glaucoma

### Cumulative hazard curves by the Kaplan-Meier method

Figure 1 illustrates the cumulative hazard curves for AD in the NTG group and the comparison group. A log-rank test revealed a statistically significant difference between the hazard curves of the two groups (*p*-value < 0.0001).

### Univariate and multivariate analyses by the Cox regression model

The unadjusted HR for AD was 1.66 times greater in the NTG group than in the comparison group (95% CI: 1.55-1.79) (Table 2). After adjusting for covariates, the

1  
2  
3 significantly greater hazard ratio for AD in the NTG group remained (adjusted HR=  
4 1.52; 95% CI: 1.41-1.63). Age was a significant risk factor for AD in both the  
5 univariate and multivariate analyses. The adjusted HR for AD in patients over 75  
6 years old reached 38.85 when compared with those patients younger than 55 years  
7 old. Males were less likely to develop AD than females (adjusted HR = 0.92; 95% CI:  
8 0.86-0.98). In the univariate analysis, patients with diabetes, hypertension,  
9 hyperlipidemia, coronary artery disease, or stroke had a significantly higher risk of  
10 developing AD. After adjustment for the covariates, only stroke remained a  
11 significant risk factor for AD (adjusted HR = 1.73; 95% CI: 1.61-1.87).  
12  
13  
14  
15  
16  
17  
18  
19  
20  
21  
22  
23  
24  
25  
26  
27  
28  
29  
30  
31  
32  
33  
34  
35  
36  
37  
38  
39  
40  
41  
42  
43  
44  
45  
46  
47  
48  
49  
50  
51  
52  
53  
54  
55  
56  
57  
58  
59  
60

**Table 2. Analysis of Risk Factors for Alzheimer's disease in patients with and without normal tension glaucoma**

| Predictive variables            | Univariate analysis       |                | Multivariate analysis   |                |
|---------------------------------|---------------------------|----------------|-------------------------|----------------|
|                                 | Unadjusted HR<br>(95% CI) | <i>P</i> value | Adjusted HR<br>(95% CI) | <i>P</i> value |
| <b>NTG</b> (Yes vs. No)         | 1.66 (1.55–1.79)          | <0.0001        | 1.52 (1.41–1.63)        | <0.0001        |
| <b>Age</b>                      |                           |                |                         |                |
| <55                             | Reference                 |                | Reference               |                |
| 55-65                           | 5.40 (4.30–6.78)          | <0.0001        | 4.97 (3.95–6.24)        | 0.0002         |
| 65-75                           | 20.25 (16.45–24.94)       | <0.0001        | 17.33 (14.02–21.42)     | <0.0001        |
| ≥75                             | 47.85 (38.92–58.82)       | <0.0001        | 38.85 (31.43–48.02)     | <0.0001        |
| <b>Gender</b> (Male vs. Female) | 0.81 (0.76–0.87)          | <0.0001        | 0.92 (0.86–0.98)        | 0.01           |
| <b>Comorbidities</b>            |                           |                |                         |                |
| Diabetes                        | 1.56 (1.45–1.66)          | <0.0001        | 1.05 (0.98–1.13)        | 0.20           |
| Hypertension                    | 2.98 (2.74–3.23)          | <0.0001        | 1.07 (0.97–1.17)        | 0.17           |
| Hyperlipidemia                  | 1.30 (1.21–1.39)          | <0.0001        | 1.01 (0.94–1.09)        | 0.79           |
| Coronary artery disease         | 2.27 (2.13–2.42)          | <0.0001        | 1.06 (0.99–1.14)        | 0.10           |
| Stroke                          | 3.39 (3.16–3.64)          | <0.0001        | 1.73 (1.61–1.87)        | <0.0001        |

NTG indicates normal tension glaucoma; HR indicates hazard ratio; CI indicates confidence interval; In the multivariate analysis, all the other variables listed in the table were included for adjustment.

### Risk factors for depression among NTG patients

Table 3 displays the risk factors for AD among NTG patients. Older age, female gender, and stroke significantly increased the risk of developing AD among NTG patients in univariate as well as multivariate cox regression analyses. Moreover, when we compared the effects of different types of glaucoma eye drops, none of them were significant risk factors or protective factors for AD.

**Table 3. Analysis of risk factors for AD among patients with normal tension glaucoma**

| Predictive variables                          | Univariate analysis       |                 | Multivariate analysis   |                 |
|-----------------------------------------------|---------------------------|-----------------|-------------------------|-----------------|
|                                               | Unadjusted HR<br>(95% CI) | <i>p</i> -value | Adjusted HR<br>(95% CI) | <i>p</i> -value |
| <b>Age</b>                                    |                           |                 |                         |                 |
| <55                                           | Reference                 |                 | Reference               |                 |
| 55-65                                         | 5.14 (3.48-7.59)          | <0.0001         | 4.74 (3.20-7.02)        | <0.0001         |
| 65-75                                         | 14.65 (10.20-21.04)       | <0.0001         | 12.83 (8.85-18.60)      | <0.0001         |
| ≥75                                           | 34.06 (23.83-48.68)       | <0.0001         | 29.01 (20.04-42.00)     | <0.0001         |
| <b>Gender</b> (Male vs. Female)               | 0.93 (0.83–1.06)          | 0.28            | 0.81 (0.71-0.92)        | 0.0009          |
| <b>Comorbidities</b>                          |                           |                 |                         |                 |
| Diabetes                                      | 1.36 (1.20-1.54)          | <0.0001         | 1.01 (0.88-1.15)        | 0.91            |
| Hypertension                                  | 2.99 (2.54–3.52)          | <0.0001         | 1.11 (0.93-1.32)        | 0.27            |
| Hyperlipidemia                                | 1.21 (1.07-1.37)          | 0.002           | 1.08 (0.95-1.23)        | 0.23            |
| Coronary artery disease                       | 2.21 (1.95-2.50)          | <0.0001         | 1.14 (0.99-1.30)        | 0.06            |
| Stroke                                        | 2.55 (2.21–2.94)          | <0.0001         | 1.38 (1.19-1.60)        | <0.0001         |
| <b>Types of glaucoma eye drops</b>            |                           |                 |                         |                 |
| α-agonist (Yes vs. No)                        | 1.42 (1.20-1.69)          | <0.0001         | 0.93 (0.82-1.06)        | 0.25            |
| Carbonic anhydrase inhibitors<br>(Yes vs. No) | 0.80 (0.61-1.04)          | 0.09            | 0.89 (0.74-1.06)        | 0.19            |
| β-blocker (Yes vs. No)                        | 1.19 (0.83-1.69)          | 0.34            | 0.85 (0.70-1.04)        | 0.12            |
| Parasympathomimetics<br>(pilocarpine)         | 1.26 (0.52-3.02)          | 0.61            | 0.96 (0.68-1.36)        | 0.83            |
| Prostaglandin analogs (Yes<br>vs. No)         | 1.03 (0.88-1.21)          | 0.72            | 1.07 (0.93-1.23)        | 0.37            |

NTD indicates New Taiwan Dollar; HR indicates hazard ratio; CI indicates confidence interval; AC indicates angle closure. In the multivariate analysis, all the other variables listed in the table were included for adjustment.



## Discussion

We conducted a 13-year cohort study on population-based data from the Taiwan NHIRD. Compared with those without glaucoma, patients with NTG had a significantly higher risk (HR = 1.52) of developing AD after adjustment for age, gender, and comorbidities. Among NTG patients, older age, female gender, and stroke were significant risk factors for developing AD. However, the types of glaucoma eye drops were not risk factors or protective factors for AD among NTG patients.

Both NTG and high-tension glaucoma (HTG) belong to POAG. They present a continuum of POAG, in which the underlying mechanism shifts from predominantly elevated IOP in HTG to hemodynamic changes in NTG. Lee et al. conducted a cross-sectional study in South Korea and found that NTG patients had a significantly higher prevalence of hypertension, hyperlipidemia, ischemic heart disease, and metabolic syndrome.<sup>31</sup> These findings are compatible with our findings in Table 1. Compared with non-NTG patients, we also found that NTG patients tended to be older and female predominant. These findings are consistent with the previous literature.<sup>16</sup>

Previous studies regarding the relationship between glaucoma and AD have mostly investigated the association between POAG and AD.<sup>27-28, 32-34</sup> Nevertheless, POAG includes NTG and HTG, which are distinctive disease entities. NTG has different features compared to HTG, such as IOP-independent mechanisms and characteristic patterns of structural/functional damage.<sup>31, 35</sup> Therefore, it is not clear enough to regard NTG and HTG as one to evaluate the subsequent risk of AD. One strength of our study is that we specified the association between NTG and AD. To the best of our knowledge, only one previous population-based study focused on the

1  
2  
3 relationship between NTG and AD.<sup>29</sup> Bach-Holm et al. tracked 69 NTG patients in  
4 Denmark for a mean follow-up period of 12.7 years and did not find any significantly  
5 higher risk of developing dementia/AD compared with the general population. In  
6 fact, none of those 69 NTG patients subsequently developed AD. Statistically, the  
7 case numbers were too small to perform analyses effectively. It is another strength  
8 of our study that we included over 15,000 NTG patients from our nationwide  
9 database. Thus, we have sufficient statistical power to draw convincing conclusions.  
10  
11  
12  
13  
14  
15  
16  
17

18 Another strength of our study is the adjustment for possible confounders in the  
19 Cox regression. Table 2 shows that the unadjusted HR for AD is 1.66 (95% CI: 1.55 to  
20 1.79) in the NTG group compared with the comparison group. Age, female gender,  
21 and vascular/metabolic comorbidities have been reported to be risk factors of both  
22 NTG and AD;<sup>16, 31, 36-37</sup> thus, these should be adjusted for as confounders to address  
23 the association between NTG and AD. Due to the completeness of our database, we  
24 obtained inpatient and outpatient medical records of the whole population. After  
25 adjustment for confounders, the association between NTG and AD was still  
26 significant (HR= 1.52; 95% CI: 1.41 to 1.63), providing evidence that the significant  
27 association between NTG and AD is a real phenomenon. In addition, in our database,  
28 the diagnoses of NTG, AD, and confounding comorbidities (i.e., diabetes,  
29 hypertension, hyperlipidemia, coronary artery disease, and stroke) were accurate  
30 and were verified by the National Health Administration (NHA). In our health care  
31 system, the NHA not only checks the consistencies between the claimed data and  
32 the charts but also makes sure the patient received a standard protocol of  
33 examinations to confirm the diagnosis. Furthermore, in our database, we adopted  
34 the commonly used diagnosis classification system of ICD-9-CM codes. Thus, our  
35 results can be clearly interpreted and compared to further studies in other countries.  
36  
37  
38  
39  
40  
41  
42  
43  
44  
45  
46  
47  
48  
49  
50  
51  
52  
53  
54  
55

56 Still another strength is that we concentrated on the NTG group to investigate  
57  
58  
59  
60

1  
2  
3 the risk factors for AD. Table 3 shows that among NTG patients, age, female gender,  
4 and stroke significantly increased the risk of subsequent AD. To the best of our  
5 knowledge, this is the first study to find factors that were associated with an  
6 increased risk of subsequent AD among NTG patients. This finding reminds us to be  
7 alert when we identify these high-risk factors among patients with NTG.  
8  
9  
10  
11  
12

13  
14 Previous animal and in vitro studies have revealed that Betaxolol and  
15 Brimonidine eye drops are neuroprotective.<sup>38-42</sup> However, in our study, none of the  
16 glaucoma eye drops were identified as risk factors or protective factors for AD  
17 among the NTG patients. Further studies are warranted to investigate the issue.  
18  
19  
20  
21

22 A limitation of our study is that NHIRD does not provide information regarding  
23 the severity of visual field defects or visual acuity. Therefore, we could not evaluate  
24 whether the risk of AD was positively correlated with the severity of NTG or visual  
25 impairment. Future studies including chart review will be conducted to consider  
26 these factors.  
27  
28  
29  
30  
31

32 The findings from our study have both clinical and public health implications.  
33 Clinically, when treating NTG patients, ophthalmologists need to focus not only on  
34 the medical aspects of NTG but must also on changes in cognitive function or  
35 memory. NTG patients at a higher risk for AD, such as older patients, female patients,  
36 and patients with stroke, should be referred to a neurologist or psychiatrist if early  
37 signs of AD become apparent. From a public health perspective, policy makers are  
38 encouraged to enforce screening for AD risk in patients with NTG and to provide  
39 more substantial and integrated care.  
40  
41  
42  
43  
44  
45  
46  
47  
48  
49  
50  
51  
52  
53  
54  
55  
56  
57  
58  
59  
60

## References

1. Gordon MO, Beiser JA, Brandt JD, et al. The Ocular Hypertension Treatment Study: baseline factors that predict the onset of primary open-angle glaucoma. *Archives of ophthalmology* 2002;120(6):714-20.
2. Sommer A, Tielsch JM, Katz J, et al. Relationship between intraocular pressure and primary open angle glaucoma among white and black Americans. The Baltimore Eye Survey. *Archives of ophthalmology* 1991;109(8):1090-5.
3. Weih LM, Nanjan M, McCarty CA, et al. Prevalence and predictors of open-angle glaucoma: results from the visual impairment project. *Ophthalmology* 2001;108(11):1966-72.
4. Bonomi L, Marchini G, Marraffa M, et al. Prevalence of glaucoma and intraocular pressure distribution in a defined population. The Egna-Neumarkt Study. *Ophthalmology* 1998;105(2):209-15.
5. Cho HK, Kee C. Population-based glaucoma prevalence studies in Asians. *Survey of ophthalmology* 2014;59(4):434-47.
6. Klein BE, Klein R, Sponsel WE, et al. Prevalence of glaucoma. The Beaver Dam Eye Study. *Ophthalmology* 1992;99(10):1499-504.
7. Rotchford AP, Johnson GJ. Glaucoma in Zulus: a population-based cross-sectional survey in a rural district in South Africa. *Archives of ophthalmology* 2002;120(4):471-8.
8. Caprioli J, Coleman AL. Blood pressure, perfusion pressure, and glaucoma. *Am J Ophthalmol* 2010;149(5):704-12.
9. Flammer J, Konieczka K, Flammer AJ. The primary vascular dysregulation syndrome: implications for eye diseases. *The EPMA journal* 2013;4(1):14.
10. Mozaffarieh M, Flammer J. New insights in the pathogenesis and treatment of normal tension glaucoma. *Current opinion in pharmacology* 2013;13(1):43-9.
11. Park HY, Park SH, Park CK. Central visual field progression in normal-tension glaucoma patients with autonomic dysfunction. *Investigative ophthalmology & visual science* 2014;55(4):2557-63.
12. Siaudvytyte L, Januleviciene I, Daveckaite A, et al. Literature review and meta-analysis of translaminal pressure difference in open-angle glaucoma. *Eye* 2015;29(10):1242-50.
13. Mroczkowska S, Benavente-Perez A, Negi A, et al. Primary open-angle glaucoma vs normal-tension glaucoma: the vascular perspective. *JAMA ophthalmology* 2013;131(1):36-43.
14. Burns A, Iliffe S. Alzheimer's disease. *BMJ* 2009;338:b158.
15. Tiraboschi P, Hansen LA, Thal LJ, et al. The importance of neuritic plaques and

- 1  
2  
3 tangles to the development and evolution of AD. *Neurology*  
4 2004;62(11):1984-9.  
5  
6 16. Mallick J, Devi L, Malik PK, et al. Update on Normal Tension Glaucoma. *Journal of*  
7 *ophthalmic & vision research* 2016;11(2):204-8.  
8  
9 17. Berisha F, Feke GT, Trempe CL, et al. Retinal abnormalities in early Alzheimer's  
10 disease. *Investigative ophthalmology & visual science* 2007;48(5):2285-9.  
11  
12 18. Guo L, Duggan J, Cordeiro MF. Alzheimer's disease and retinal neurodegeneration.  
13 *Current Alzheimer research* 2010;7(1):3-14.  
14  
15 19. Kesler A, Vakhapova V, Korczyn AD, et al. Retinal thickness in patients with mild  
16 cognitive impairment and Alzheimer's disease. *Clinical neurology and*  
17 *neurosurgery* 2011;113(7):523-6.  
18  
19 20. Sadun AA, Bassi CJ. Optic nerve damage in Alzheimer's disease. *Ophthalmology*  
20 1990;97(1):9-17.  
21  
22 21. Vickers JC, Craig JE, Stankovich J, et al. The apolipoprotein epsilon4 gene is  
23 associated with elevated risk of normal tension glaucoma. *Molecular vision*  
24 2002;8:389-93.  
25  
26 22. Liu YH, Tian T. Hypothesis of optineurin as a new common risk factor in  
27 normal-tension glaucoma and Alzheimer's disease. *Medical hypotheses*  
28 2011;77(4):591-2.  
29  
30 23. Osawa T, Mizuno Y, Fujita Y, et al. Optineurin in neurodegenerative diseases.  
31 *Neuropathology : official journal of the Japanese Society of Neuropathology*  
32 2011;31(6):569-74.  
33  
34 24. Tamura H, Kawakami H, Kanamoto T, et al. High frequency of open-angle  
35 glaucoma in Japanese patients with Alzheimer's disease. *Journal of the*  
36 *neurological sciences* 2006;246(1-2):79-83.  
37  
38 25. Bayer AU, Ferrari F, Erb C. High occurrence rate of glaucoma among patients with  
39 Alzheimer's disease. *European neurology* 2002;47(3):165-8.  
40  
41 26. Bayer AU, Keller ON, Ferrari F, et al. Association of glaucoma with  
42 neurodegenerative diseases with apoptotic cell death: Alzheimer's disease  
43 and Parkinson's disease. *American Journal of Ophthalmology*  
44 2002;133(1):135-37.  
45  
46 27. Helmer C, Malet F, Rougier MB, et al. Is there a link between open-angle  
47 glaucoma and dementia? The Three-City-Alienor cohort. *Annals of neurology*  
48 2013;74(2):171-9.  
49  
50 28. Lin IC, Wang YH, Wang TJ, et al. Glaucoma, Alzheimer's disease, and Parkinson's  
51 disease: an 8-year population-based follow-up study. *PloS one*  
52 2014;9(9):e108938.  
53  
54 29. Bach-Holm D, Kessing SV, Mogensen U, et al. Normal tension glaucoma and  
55  
56  
57  
58  
59

- 1  
2  
3 Alzheimer disease: comorbidity? *Acta ophthalmologica* 2012;90(7):683-5.  
4  
5 30. Ekstrom C, Kilander L. Open-angle glaucoma and Alzheimer's disease: a  
6 population-based 30-year follow-up study. *Acta ophthalmologica*  
7 2017;95(2):e157-e58.  
8  
9 31. Lee SH, Kim GA, Lee W, et al. Vascular and metabolic comorbidities in open-angle  
10 glaucoma with low- and high-teen intraocular pressure: a cross-sectional  
11 study from South Korea. 2017;95(7):e564-e74.  
12  
13 32. Kessing LV, Lopez AG, Andersen PK, et al. No increased risk of developing  
14 Alzheimer disease in patients with glaucoma. *Journal of glaucoma*  
15 2007;16(1):47-51.  
16  
17 33. Ou Y, Grossman DS, Lee PP, et al. Glaucoma, Alzheimer disease and other  
18 dementia: a longitudinal analysis. *Ophthalmic epidemiology*  
19 2012;19(5):285-92.  
20  
21 34. Keenan TD, Goldacre R, Goldacre MJ. Associations between primary open angle  
22 glaucoma, Alzheimer's disease and vascular dementia: record linkage study.  
23 *The British journal of ophthalmology* 2015;99(4):524-7.  
24  
25 35. Kim KE, Park KH. Update on the Prevalence, Etiology, Diagnosis, and Monitoring  
26 of Normal-Tension Glaucoma. *Asia-Pacific journal of ophthalmology*  
27 *(Philadelphia, Pa)* 2016;5(1):23-31.  
28  
29 36. Hersi M, Irvine B, Gupta P, et al. Risk factors associated with the onset and  
30 progression of Alzheimer's disease: A systematic review of the evidence.  
31 *Neurotoxicology* 2017;61:143-87.  
32  
33 37. Stefanova E, Pavlovic A, Jovanovic Z, et al. Vascular risk factors in Alzheimer's  
34 disease - preliminary report. *Journal of the neurological sciences*  
35 2012;322(1-2):166-9.  
36  
37 38. Baptiste DC, Hartwick AT, Jollimore CA, et al. Comparison of the neuroprotective  
38 effects of adrenoceptor drugs in retinal cell culture and intact retina.  
39 *Investigative ophthalmology & visual science* 2002;43(8):2666-76.  
40  
41 39. Lee D, Kim KY, Noh YH, et al. Brimonidine blocks glutamate excitotoxicity-induced  
42 oxidative stress and preserves mitochondrial transcription factor a in ischemic  
43 retinal injury. *PLoS one* 2012;7(10):e47098.  
44  
45 40. Osborne NN, DeSantis L, Bae JH, et al. Topically applied betaxolol attenuates  
46 NMDA-induced toxicity to ganglion cells and the effects of ischaemia to the  
47 retina. *Experimental eye research* 1999;69(3):331-42.  
48  
49 41. Tatton W, Chen D, Chalmers-Redman R, et al. Hypothesis for a common basis for  
50 neuroprotection in glaucoma and Alzheimer's disease: anti-apoptosis by  
51 alpha-2-adrenergic receptor activation. *Survey of ophthalmology* 2003;48  
52 Suppl 1:S25-37.  
53  
54  
55  
56  
57  
58  
59  
60

1  
2  
3  
4  
5  
6  
7  
8  
9  
10  
11  
12  
13  
14  
15  
16  
17  
18  
19  
20  
21  
22  
23  
24  
25  
26  
27  
28  
29  
30  
31  
32  
33  
34  
35  
36  
37  
38  
39  
40  
41  
42  
43  
44  
45  
46  
47  
48  
49  
50  
51  
52  
53  
54  
55  
56  
57  
58  
59  
60

42. Wood JP, DeSantis L, Chao HM, et al. Topically applied betaxolol attenuates ischaemia-induced effects to the rat retina and stimulates BDNF mRNA. *Experimental eye research* 2001;72(1):79-86.

For peer review only

## Figure Legends

**Fig. 1. Kaplan-Meier curves for Alzheimer's disease among NTG patients and the comparison group.** The black line represents the NTG group and the gray line represents the comparison group.

For peer review only



1  
2  
3  
4  
5  
6  
7  
8  
9  
10  
11  
12  
13  
14  
15  
16  
17  
18  
19  
20  
21  
22  
23  
24  
25  
26  
27  
28  
29  
30  
31  
32  
33  
34  
35  
36  
37  
38  
39  
40  
41  
42  
43  
44  
45  
46  
47  
48  
49  
50  
51  
52  
53  
54  
55  
56  
57  
58  
59  
60

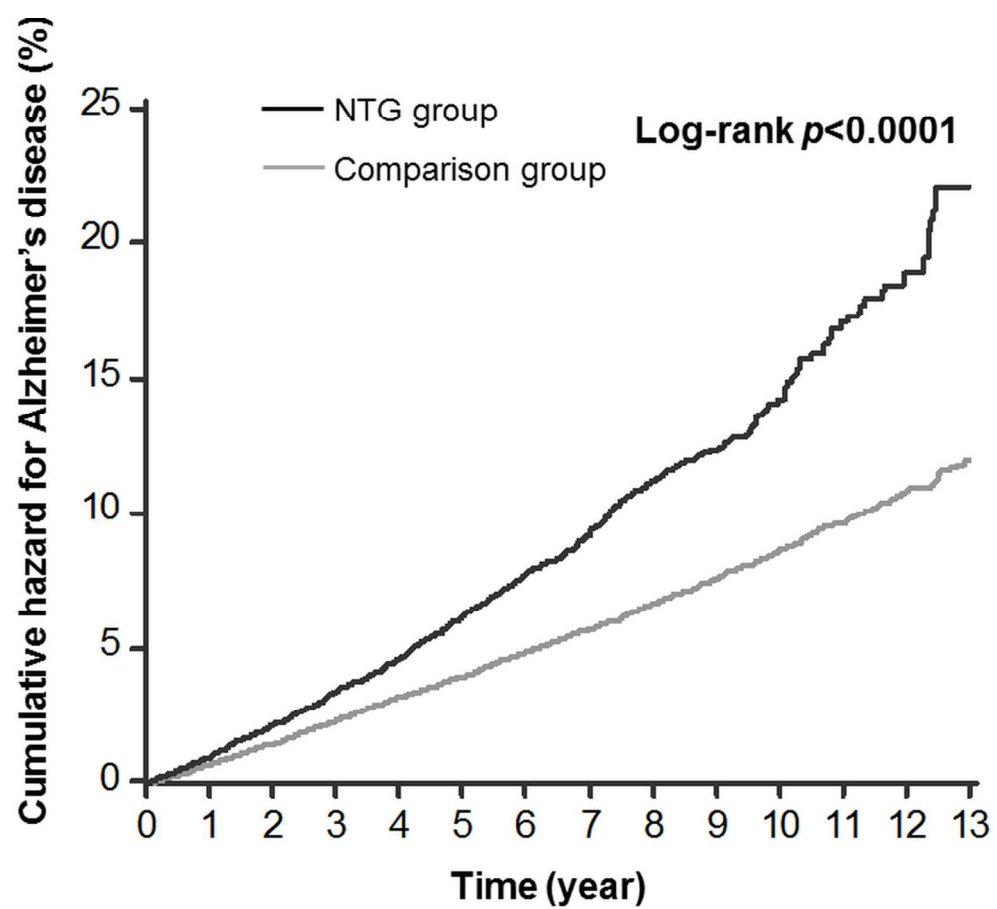

Fig. 1. Kaplan-Meier curves for Alzheimer's disease among NTG patients and the comparison group. The black line represents the NTG group and the gray line represents the comparison group.

135x120mm (300 x 300 DPI)

**STROBE 2007 (v4) checklist of items to be included in reports of observational studies in epidemiology\***  
**Checklist for cohort, case-control, and cross-sectional studies (combined)**

| Section/Topic             | Item # | Recommendation                                                                                                                                                                                                                                                                                                                                                                                                                                                         | Reported on page # |
|---------------------------|--------|------------------------------------------------------------------------------------------------------------------------------------------------------------------------------------------------------------------------------------------------------------------------------------------------------------------------------------------------------------------------------------------------------------------------------------------------------------------------|--------------------|
| Title and abstract        | 1      | (a) Indicate the study's design with a commonly used term in the title or the abstract                                                                                                                                                                                                                                                                                                                                                                                 | 3                  |
|                           |        | (b) Provide in the abstract an informative and balanced summary of what was done and what was found                                                                                                                                                                                                                                                                                                                                                                    | 3-4                |
| <b>Introduction</b>       |        |                                                                                                                                                                                                                                                                                                                                                                                                                                                                        |                    |
| Background/rationale      | 2      | Explain the scientific background and rationale for the investigation being reported                                                                                                                                                                                                                                                                                                                                                                                   | 6-7                |
| Objectives                | 3      | State specific objectives, including any pre-specified hypotheses                                                                                                                                                                                                                                                                                                                                                                                                      | 7                  |
| <b>Methods</b>            |        |                                                                                                                                                                                                                                                                                                                                                                                                                                                                        |                    |
| Study design              | 4      | Present key elements of study design early in the paper                                                                                                                                                                                                                                                                                                                                                                                                                | 8                  |
| Setting                   | 5      | Describe the setting, locations, and relevant dates, including periods of recruitment, exposure, follow-up, and data collection                                                                                                                                                                                                                                                                                                                                        | 8                  |
| Participants              | 6      | (a) <i>Cohort study</i> —Give the eligibility criteria, and the sources and methods of selection of participants. Describe methods of follow-up<br><i>Case-control study</i> —Give the eligibility criteria, and the sources and methods of case ascertainment and control selection. Give the rationale for the choice of cases and controls<br><i>Cross-sectional study</i> —Give the eligibility criteria, and the sources and methods of selection of participants | 8-9                |
|                           |        | (b) <i>Cohort study</i> —For matched studies, give matching criteria and number of exposed and unexposed<br><i>Case-control study</i> —For matched studies, give matching criteria and the number of controls per case                                                                                                                                                                                                                                                 | 8                  |
| Variables                 | 7      | Clearly define all outcomes, exposures, predictors, potential confounders, and effect modifiers. Give diagnostic criteria, if applicable                                                                                                                                                                                                                                                                                                                               | 9                  |
| Data sources/ measurement | 8*     | For each variable of interest, give sources of data and details of methods of assessment (measurement). Describe comparability of assessment methods if there is more than one group                                                                                                                                                                                                                                                                                   | 8                  |
| Bias                      | 9      | Describe any efforts to address potential sources of bias                                                                                                                                                                                                                                                                                                                                                                                                              | 9                  |
| Study size                | 10     | Explain how the study size was arrived at                                                                                                                                                                                                                                                                                                                                                                                                                              | 9                  |
| Quantitative variables    | 11     | Explain how quantitative variables were handled in the analyses. If applicable, describe which groupings were chosen and why                                                                                                                                                                                                                                                                                                                                           | 9                  |
| Statistical methods       | 12     | (a) Describe all statistical methods, including those used to control for confounding                                                                                                                                                                                                                                                                                                                                                                                  | 9                  |
|                           |        | (b) Describe any methods used to examine subgroups and interactions                                                                                                                                                                                                                                                                                                                                                                                                    | 9                  |
|                           |        | (c) Explain how missing data were addressed                                                                                                                                                                                                                                                                                                                                                                                                                            | 9                  |
|                           |        | (d) <i>Cohort study</i> —If applicable, explain how loss to follow-up was addressed<br><i>Case-control study</i> —If applicable, explain how matching of cases and controls was addressed                                                                                                                                                                                                                                                                              | 8                  |

|                          |     |                                                                                                                                                                                                              |       |
|--------------------------|-----|--------------------------------------------------------------------------------------------------------------------------------------------------------------------------------------------------------------|-------|
|                          |     | <i>Cross-sectional study</i> —If applicable, describe analytical methods taking account of sampling strategy                                                                                                 |       |
|                          |     | (e) Describe any sensitivity analyses                                                                                                                                                                        | 9     |
| <b>Results</b>           |     |                                                                                                                                                                                                              |       |
| Participants             | 13* | (a) Report numbers of individuals at each stage of study—eg numbers potentially eligible, examined for eligibility, confirmed eligible, included in the study, completing follow-up, and analysed            | 10    |
|                          |     | (b) Give reasons for non-participation at each stage                                                                                                                                                         | 10    |
|                          |     | (c) Consider use of a flow diagram                                                                                                                                                                           | 10    |
| Descriptive data         | 14* | (a) Give characteristics of study participants (eg demographic, clinical, social) and information on exposures and potential confounders                                                                     | 10-11 |
|                          |     | (b) Indicate number of participants with missing data for each variable of interest                                                                                                                          | 11    |
|                          |     | (c) <i>Cohort study</i> —Summarise follow-up time (eg, average and total amount)                                                                                                                             | 11    |
| Outcome data             | 15* | <i>Cohort study</i> —Report numbers of outcome events or summary measures over time                                                                                                                          | 13    |
|                          |     | <i>Case-control study</i> —Report numbers in each exposure category, or summary measures of exposure                                                                                                         | NA    |
|                          |     | <i>Cross-sectional study</i> —Report numbers of outcome events or summary measures                                                                                                                           | NA    |
| Main results             | 16  | (a) Give unadjusted estimates and, if applicable, confounder-adjusted estimates and their precision (eg, 95% confidence interval). Make clear which confounders were adjusted for and why they were included | 11    |
|                          |     | (b) Report category boundaries when continuous variables were categorized                                                                                                                                    | 11    |
|                          |     | (c) If relevant, consider translating estimates of relative risk into absolute risk for a meaningful time period                                                                                             | NA    |
| Other analyses           | 17  | Report other analyses done—eg analyses of subgroups and interactions, and sensitivity analyses                                                                                                               | 14    |
| <b>Discussion</b>        |     |                                                                                                                                                                                                              |       |
| Key results              | 18  | Summarise key results with reference to study objectives                                                                                                                                                     | 15    |
| Limitations              | 19  | Discuss limitations of the study, taking into account sources of potential bias or imprecision. Discuss both direction and magnitude of any potential bias                                                   | 17    |
| Interpretation           | 20  | Give a cautious overall interpretation of results considering objectives, limitations, multiplicity of analyses, results from similar studies, and other relevant evidence                                   | 15-16 |
| Generalisability         | 21  | Discuss the generalisability (external validity) of the study results                                                                                                                                        | 17    |
| <b>Other information</b> |     |                                                                                                                                                                                                              |       |
| Funding                  | 22  | Give the source of funding and the role of the funders for the present study and, if applicable, for the original study on which the present article is based                                                | 2     |

\*Give information separately for cases and controls in case-control studies and, if applicable, for exposed and unexposed groups in cohort and cross-sectional studies.

**Note:** An Explanation and Elaboration article discusses each checklist item and gives methodological background and published examples of transparent reporting. The STROBE checklist is best used in conjunction with this article (freely available on the Web sites of PLoS Medicine at <http://www.plosmedicine.org/>, Annals of Internal Medicine at <http://www.annals.org/>, and Epidemiology at <http://www.epidem.com/>). Information on the STROBE Initiative is available at [www.strobe-statement.org](http://www.strobe-statement.org).

# BMJ Open

## The Association between Normal Tension Glaucoma and the Risk of Alzheimer's Disease: A Nationwide Population-based Cohort study in Taiwan

|                                 |                                                                                                                                                                                                                                                                                                                                                                                                                                                                                                                                                                                                                                                                        |
|---------------------------------|------------------------------------------------------------------------------------------------------------------------------------------------------------------------------------------------------------------------------------------------------------------------------------------------------------------------------------------------------------------------------------------------------------------------------------------------------------------------------------------------------------------------------------------------------------------------------------------------------------------------------------------------------------------------|
| Journal:                        | <i>BMJ Open</i>                                                                                                                                                                                                                                                                                                                                                                                                                                                                                                                                                                                                                                                        |
| Manuscript ID                   | bmjopen-2018-022987.R1                                                                                                                                                                                                                                                                                                                                                                                                                                                                                                                                                                                                                                                 |
| Article Type:                   | Research                                                                                                                                                                                                                                                                                                                                                                                                                                                                                                                                                                                                                                                               |
| Date Submitted by the Author:   | 01-Jun-2018                                                                                                                                                                                                                                                                                                                                                                                                                                                                                                                                                                                                                                                            |
| Complete List of Authors:       | CHEN, YU-YEN; Taichung Veterans General Hospital, Department of Ophthalmology<br>Lai, Yun-ju; Puli Branch of Taichung Veterans General Hospital, Department of Internal Medicine<br>Yen, Yong-Fong ; Taipei City Hospital, Section of Infectious Diseases<br>Shen, Ying-Cheng; Taichung Veterans General Hospital, Department of Ophthalmology<br>Wang, Chun-Yuan; Taichung Veterans General Hospital, Department of Ophthalmology<br>Liang, Chiao-Ying; Taichung Veterans General Hospital, Department of Ophthalmology<br>Lin, Keng-Hung ; Taichung Veterans General Hospital, Department of Ophthalmology<br>Fan, Lir-Wan; University of Mississippi Medical Center |
| <b>Primary Subject Heading</b>: | Ophthalmology                                                                                                                                                                                                                                                                                                                                                                                                                                                                                                                                                                                                                                                          |
| Secondary Subject Heading:      | Epidemiology, Neurology                                                                                                                                                                                                                                                                                                                                                                                                                                                                                                                                                                                                                                                |
| Keywords:                       | normal tension glaucoma, Alzheimer's disease, risk factors, National Health Insurance Research Database, cohort study                                                                                                                                                                                                                                                                                                                                                                                                                                                                                                                                                  |
|                                 |                                                                                                                                                                                                                                                                                                                                                                                                                                                                                                                                                                                                                                                                        |

SCHOLARONE™  
Manuscripts

1  
2  
3  
4 **The Association between Normal Tension Glaucoma and the**  
5  
6 **Risk of Alzheimer's Disease: A Nationwide Population-based**  
7  
8 **Cohort study in Taiwan**  
9  
10

11  
12  
13 Yu-Yen Chen,<sup>1,2,3</sup> Yun-Ju Lai,<sup>2,4,5</sup> Yong-Fong Yen,<sup>2,6</sup> Ying-Cheng Shen,<sup>1</sup>

14  
15 Chun-Yuan Wang,<sup>1</sup> Chiao-Ying Liang,<sup>1</sup> Keng-Hung Lin,<sup>1</sup> Lir-Wan Fan<sup>7\*</sup>  
16  
17

18  
19 <sup>1</sup>Department of Ophthalmology, Taichung Veterans General Hospital, Taichung,  
20  
21 Taiwan.  
22

23  
24 <sup>2</sup>School of Medicine, National Yang-Ming University, Taipei, Taiwan.  
25

26  
27 <sup>3</sup>Community Medicine Research Center and Institute of Public Health, National  
28  
29 Yang-Ming University, Taipei, Taiwan.

30  
31 <sup>4</sup>Division of Endocrinology and Metabolism, Department of Internal Medicine, Puli  
32  
33 Branch of Taichung Veterans General Hospital, Nantou, Taiwan

34  
35 <sup>5</sup>Department of Exercise Health Science, National Taiwan University of Sport,  
36  
37 Taichung, Taiwan

38  
39 <sup>5</sup>Department of Exercise Health Science, National Taiwan University of Sport,  
40  
41 Taichung, Taiwan

42  
43 <sup>6</sup>Section of Infectious Diseases, Taipei City Hospital, Taipei City Government, Taipei, Taiwan

44  
45 <sup>7</sup>Department of Pediatrics; Division of Newborn Medicine, University of Mississippi  
46  
47 Medical Center, Mississippi, USA  
48  
49

50 **\*Correspondence to:**

51 **Yu-Yen Chen, MD., Ph.D.**

52  
53 Department of Ophthalmology, Taichung Veterans General Hospital, Taichung, Taiwan.  
54  
55 1650 Taiwan Boulevard Sect. 4, Taichung, Taiwan 40705  
56  
57  
58  
59  
60

1  
2  
3 Tel : 886-4-23592525

4 Fax : 886-4-23595046

5  
6 E-mail address: yuyenchen.phd@gmail.com

7  
8  
9 **Word count:** 2814

#### 10 **Author Contributors**

11 Conceptualization: YYC, YJL, YFY, YCS, and LWF; Formal analysis: YYC, YJL, CYW and LWF; Investigation:  
12 YYC, CYW, CYL, KHL and LWF; Methodology: YYC, YJL, YFY, HYH, and YCS; Validation: YYC, YFY, and KHL;  
13 Writing the original draft: YYC, and LWF.  
14

#### 15 **Funding statement**

16 This research received no specific grant from any funding agency in the public, commercial or  
17 not-for-profit sectors.  
18

#### 19 **Competing interest**

20 None.  
21

#### 22 **Ethics approval**

23 This study has been approved by the institutional review board of National Yang-Ming University  
24 (2015A018).  
25

#### 26 **Data sharing statement**

27 Data are available from the National Health Insurance Research Database (NHIRD) published by  
28 Taiwan National Health Insurance (NHI) Bureau. The data utilized in this study cannot be made  
29 available in the manuscript, the supplemental files, or in a public repository due to the Personal  
30 Information Protection Act executed by Taiwan's government, starting from 2012. Requests for data  
31 can be sent as a formal proposal to the NHIRD (<http://nhird.nhri.org.tw>) or by email to  
32 wt.gro.irhn@drihn.  
33  
34  
35  
36  
37  
38  
39  
40  
41  
42  
43  
44  
45  
46  
47  
48  
49  
50  
51  
52  
53  
54  
55  
56  
57  
58  
59  
60

# The Association between Normal Tension Glaucoma and the Risk of Alzheimer's Disease: A Nationwide Population-based Cohort study in Taiwan

## Abstract

**Objectives:** To investigate a possible association between normal tension glaucoma (NTG) and an increased risk of developing Alzheimer's disease (AD).

**Design:** Retrospective cohort study.

**Setting:** NTG group and the comparison group were retrieved from the whole population of the Taiwan National Health Insurance Research Database (NHIRD) from January 1, 2001, to December 31, 2013.

**Participants:** A total of 15,317 subjects with NTG were enrolled in the NTG group, and 61,268 age- and gender-matched subjects without glaucoma were enrolled in the comparison group.

**Primary and secondary outcome measures:** Kaplan-Meier curves were generated to compare the cumulative hazard of AD between the two groups. A multivariable Cox regression analysis was used to estimate the adjusted hazard ratios (HRs) of AD, adjusted for diabetes, hypertension, hyperlipidemia, coronary artery disease, and stroke. Furthermore, risks factors for developing AD among the NTG group were investigated.

**Results:** The mean age of the cohort was 62.1±12.5 years. NTG patients had significantly higher proportions of diabetes, hypertension, hyperlipidemia, coronary artery disease, and stroke than the comparisons. NTG patients had a significantly

1  
2  
3 higher cumulative hazard for AD than the comparisons ( $p < 0.0001$ ). In the  
4  
5 multivariable Cox regression after adjustment for confounders, the NTG group had a  
6  
7 significantly higher risk of AD (adjusted HR=1.52; 95% CI: 1.41 to 1.63). Moreover, in  
8  
9 the NTG group, when we compared the effects of different types of glaucoma eye  
10  
11 drops, none of the eye drops used were significant risk factors or protective factors  
12  
13 for AD.  
14

15  
16 **Conclusions:** People with NTG are at a significantly greater risk of developing AD  
17  
18 compared with individuals without glaucoma. Among NTG patients, none of the  
19  
20 glaucoma eye drops used significantly changed the risk of subsequent AD.  
21  
22

23  
24 Keywords: normal tension glaucoma, Alzheimer's disease, risk factors, National  
25  
26 Health Insurance Research Database, cohort study  
27  
28

## 29 30 31 **Article Summary**

### 32 33 34 **Strengths and limitations of this study**

- 35  
36 ● The study utilized the comprehensive, whole national population database with  
37  
38 a long study period to investigate the relationship between normal tension  
39  
40 glaucoma and Alzheimer's disease.
- 41  
42 ● The cohort study design and survival analysis would elucidate the association  
43  
44 between normal tension glaucoma and subsequent risk of developing  
45  
46 Alzheimer's disease.
- 47  
48 ● Possible confounders were adjusted in the Cox regression to derive the more  
49  
50 real correlation between normal tension glaucoma and Alzheimer's disease.  
51  
52  
53  
54  
55  
56  
57  
58  
59  
60



## Introduction

Glaucoma is a chronic, progressive disease with characteristics of retinal ganglion cell loss, retinal nerve fiber layer (RNFL) thinning, and optic nerve atrophy.<sup>1-3</sup> Elevated intraocular pressure (IOP) plays an important role in the development of glaucomatous optic neuropathy. However, 30 to 92 percent of primary open-angle glaucoma (POAG) have IOP within the normal range and are classified as normal tension glaucoma (NTG).<sup>2, 4-7</sup> NTG occurs because of a fragile optic nerve that can be damaged despite a normal IOP, or because of mechanisms other than an elevated IOP (e.g., insufficient ocular perfusion pressure or autonomic dysfunction).<sup>8-13</sup> Without treatment, NTG leads to optic nerve atrophy, progressive visual field loss and even blindness. The mainstay treatment for NTG, similar to the therapy for other types of glaucoma, is aimed at reducing IOP with glaucoma eye drops.

Alzheimer's disease (AD) is the most common form of dementia that is characterized by a progressive loss of memory and cognition and changes in personalities and behavior, as well as by an impaired ability to perform daily activities.<sup>14-15</sup> In the brains of AD patients, amyloid plaques and neurofibrillary tangles (aggregation of abnormal tau proteins) lead to gross atrophy of the brain.<sup>15</sup>

NTG and AD have common features. Both of them are chronic, progressive neurodegenerative diseases with an age-related and female-predominant incidence.<sup>16</sup> In structural and pathological studies, AD patients exhibit RGC loss and RNFL thinning, similar to NTG patients.<sup>17-20</sup> In genetic studies, the epsilon 4 allele of apolipoprotein E (APOE), which is a risk factor for late-onset AD, has been observed in the pathogenesis of NTG.<sup>21</sup> The optineurin gene has also been found to be

1  
2  
3 associated with both AD and NTG.<sup>22-23</sup> In addition, in clinical, cross-sectional studies,  
4  
5 Bayer and Tamura et al. have found an increased prevalence of glaucoma in AD  
6  
7 patients.<sup>24-26</sup> All of these may imply that glaucoma and AD share similar  
8  
9 pathophysiological or underlying mechanisms.  
10

11  
12 However, population-based cohort studies evaluating the association between  
13  
14 glaucoma and AD have revealed inconsistent findings. The  
15  
16 Three-City-Bordeaux-Alienor study conducted in France showed that open-angle  
17  
18 glaucoma (OAG) patients were four times more likely to develop dementia during  
19  
20 the 3-year period.<sup>27</sup> In a Taiwan registry study, Lin et al. also found a significantly  
21  
22 higher risk of developing AD among the POAG patients.<sup>28</sup> In contrast, there was no  
23  
24 increased risk of developing AD among the NTG patients in a Danish registry study  
25  
26 and among the POAG patients in a population-based study in Sweden.<sup>29-30</sup> The  
27  
28 discrepancies may be due to the insufficient statistical power, non-equivalent study  
29  
30 designs, and different diagnostic criteria.  
31  
32

33  
34 The objective of our study was to investigate whether patients with NTG have a  
35  
36 higher risk of developing AD than controls using the National Health Insurance  
37  
38 Research Database (NHIRD) in Taiwan. We utilized the whole population database,  
39  
40 therefore, had large numbers of patients and a high level of statistical power. In  
41  
42 addition, the NHIRD adopted the International Classification of Diseases, Ninth  
43  
44 Revision, Clinical Modification (ICD-9-CM) codes, which are generally accepted  
45  
46 worldwide. Thus, our results can be clearly interpreted and compared to further  
47  
48 studies in other countries.  
49  
50  
51  
52  
53  
54  
55  
56  
57  
58  
59  
60

## Materials and Methods

### Data source

The National Health Insurance (NHI) program of Taiwan covers the healthcare services of greater than 99% of Taiwan's 23 million residents. The NHIRD is maintained by the National Health Research Institutes of Taiwan and includes inpatient and outpatient medical benefit claims. In NHIRD, the diagnoses were accurate and were verified by the National Health Administration (NHA). The NHA not only checks the consistencies between the claimed data and the charts but also makes sure the patient received a standard protocol of examinations to confirm the diagnoses. To ensure confidentiality, the identification of all patients in the database was encrypted prior to releasing data for research purposes. Therefore, according to the rules of the Institutional Review Board, written informed consent was waived. Based on the healthcare claims of the entire population, we sought to compare the hazard of AD in subjects with and without NTG during the 13-year period. This study was approved by the ethical committee of Yang-Ming University Hospital (2015A018).

### Patient involvement

Patients were not directly involved in the design of this study.

### Inclusion and exclusion criteria

Using the Taiwan NHIRD from 1996 to 2013, we performed a retrospective cohort study. We first selected patients with NTG (ICD-9-CM codes 365.12) from January 1, 2001, to December 31, 2013. Patients with NTG diagnoses from January 1, 1996, to December 31, 2000, were excluded to ensure that our NTG patients were newly diagnosed. The date of the first NTG claim was defined as the index date. Those who had never received a diagnosis of glaucoma were randomly selected as a

1  
2  
3 comparison group at a ratio of 1:4 and matched with the NTG group on age, gender,  
4 and index year (the year of the index date or enrollment). The two groups were  
5 followed up to see whether they developed subsequent AD. Follow-up time was  
6 calculated from the index date (enrollment date) to the date of AD diagnosis, death,  
7 or the end of 2013, whichever occurred first. The diagnosis of AD (ICD-9-CM codes:  
8 331.0) was confirmed by neurologists or psychiatrists through a well-acknowledged,  
9 standard diagnostic protocol. Subjects who received a diagnosis of AD or dementia  
10 before the index date or enrollment were excluded to ensure that the occurrence of  
11 AD was newly diagnosed.  
12  
13  
14  
15  
16  
17  
18  
19  
20  
21  
22  
23

### 24 **Statistical analysis**

25  
26 After investigating the two groups descriptively by age, gender, and  
27 comorbidities, the group differences were analyzed by the two-sample t-test (for  
28 continuous variables) and chi-square test (for categorical variables). Survival analysis  
29 using the Kaplan-Meier method with the log-rank test was applied to describe and  
30 compare the cumulative incidence curves of AD. A Cox proportional hazard model  
31 was used to estimate the hazard ratio (HR) for the occurrence of AD according to  
32 each variable in the univariate and multivariate analyses. Variables included in the  
33 regression analysis were age, gender and comorbidities, including diabetes,  
34 hypertension, hyperlipidemia, coronary artery disease, and stroke. Comorbidities  
35 were regarded as time-dependent covariates.  
36  
37  
38  
39  
40  
41  
42  
43  
44  
45  
46

47 Subsequently, we focused on the NTG group. The Cox regression was used to  
48 identify the risk factors associated with AD among NTG patients. Variables included  
49 for analysis were age, gender, comorbidities, and different types of glaucoma eye  
50 drops. Glaucoma eye drops were identified and classified by the National Drug Code  
51 and the Anatomic Therapeutic Chemical (ATC) code. According to the classification  
52  
53  
54  
55  
56  
57  
58  
59  
60

1  
2  
3 system, types of glaucoma eye drops include  $\alpha$ -agonists, parasympathomimetics  
4  
5 (pilocarpine), carbonic anhydrase inhibitors,  $\beta$ -blockers, prostaglandin analogs, and  
6  
7 fixed combinations. All statistical operations were performed using SAS statistical  
8  
9 package, version 9.2 (SAS Institute, Cary, NC, USA).  
10  
11  
12  
13  
14  
15  
16  
17  
18  
19  
20  
21  
22  
23  
24  
25  
26  
27  
28  
29  
30  
31  
32  
33  
34  
35  
36  
37  
38  
39  
40  
41  
42  
43  
44  
45  
46  
47  
48  
49  
50  
51  
52  
53  
54  
55  
56  
57  
58  
59  
60

## Results

### Demographic characteristics of the study sample

A total of 15,317 NTG patients and 61,268 matched controls were enrolled in the study. Table 1 displays the demographics of the two groups. The mean age in both groups was 62.1 years. The NTG group had a significantly higher proportion of diabetes, hypertension, hyperlipidemia, coronary artery disease, and stroke than the comparison group. During the 13-year study period, the cumulative incidence of AD was significantly higher in the NTG group (1023/15317; 6.7%) than in the comparison group (2574/61268; 4.2%). Age of AD onset was  $73.8 \pm 8.1$  years.

**Table 1. Characteristics of the study subjects**

| Variable                                                | NTG group<br><i>n</i> =15317 | Comparison group<br><i>n</i> = 61268 | <i>p</i> -value |
|---------------------------------------------------------|------------------------------|--------------------------------------|-----------------|
|                                                         | <i>n</i> (%)                 | <i>n</i> (%)                         |                 |
| <b>Age, year, (mean±SD)</b>                             | 62.1±12.5                    | 62.1±12.5                            | 1.000           |
| <b>Age, categorical</b>                                 |                              |                                      | 1.000           |
| <55                                                     | 4778 (31.2)                  | 19112 (31.2)                         |                 |
| 55-65                                                   | 3889 (25.4)                  | 15556 (25.4)                         |                 |
| 65-75                                                   | 3627 (23.7)                  | 14508 (23.7)                         |                 |
| ≥75                                                     | 3023 (19.7)                  | 12092 (19.7)                         |                 |
| <b>Gender</b>                                           |                              |                                      | 1.000           |
| Male                                                    | 8372 (54.7)                  | 33488 (54.7)                         |                 |
| Female                                                  | 6945 (45.3)                  | 27780 (45.3)                         |                 |
| <b>Comorbidities</b>                                    |                              |                                      |                 |
| Diabetes                                                | 5110 (33.4)                  | 15671 (25.6)                         | <0.0001         |
| Hypertension                                            | 9148 (59.7)                  | 32790 (53.5)                         | <0.0001         |
| Hyperlipidemia                                          | 7590 (49.6)                  | 21628 (35.3)                         | <0.0001         |
| Coronary artery disease                                 | 5627 (36.7)                  | 16323 (26.6)                         | <0.0001         |
| Stroke                                                  | 1572 (10.3)                  | 6518 (10.6)                          | 0.18            |
| <b>Follow-up period, year<br/>(mean±SD)</b>             | 4.92±3.29                    | 4.96±3.27                            | 0.18            |
| <b>Occurrence of AD during<br/>the follow-up period</b> | 1023 (6.7)                   | 2574 (4.2)                           | <0.0001         |

NTG indicates normal tension glaucoma

### Cumulative hazard curves by the Kaplan-Meier method

Figure 1 illustrates the cumulative hazard curves for AD in the NTG group and the comparison group. A log-rank test revealed a statistically significant difference between the hazard curves of the two groups (*p*-value < 0.0001).

### Univariate and multivariate analyses by the Cox regression model

The unadjusted HR for AD was 1.66 times greater in the NTG group than in the comparison group (95% CI: 1.55-1.79) (Table 2). After adjusting for covariates, the

1  
2  
3 significantly greater hazard ratio for AD in the NTG group remained (adjusted HR=  
4 1.52; 95% CI: 1.41-1.63). Age was a significant risk factor for AD in both the  
5 univariate and multivariate analyses. The adjusted HR for AD in patients over 75  
6 years old reached 38.85 when compared with those patients younger than 55 years  
7 old. Males were less likely to develop AD than females (adjusted HR = 0.92; 95% CI:  
8 0.86-0.98). In the univariate analysis, patients with diabetes, hypertension,  
9 hyperlipidemia, coronary artery disease, or stroke had a significantly higher risk of  
10 developing AD. After adjustment for the covariates, only stroke remained a  
11 significant risk factor for AD (adjusted HR = 1.73; 95% CI: 1.61-1.87). In  
12 supplementary Table 1, subgroup analyses were also presented among individuals  
13 with older and younger age separately. Among subjects younger than 65, the  
14 adjusted HR for AD was 1.98 times greater in the NTG group than in the comparison  
15 group (95% CI: 1.63-2.42); the other independent, significant risk factors for AD were  
16 female and stroke. Among subjects older than 65, in addition to these risk factors,  
17 diabetes also significantly increased the risk for AD.  
18  
19  
20  
21  
22  
23  
24  
25  
26  
27  
28  
29  
30  
31  
32  
33  
34  
35  
36  
37  
38  
39  
40  
41  
42  
43  
44  
45  
46  
47  
48  
49  
50  
51  
52  
53  
54  
55  
56  
57  
58  
59  
60



**Table 2. Analysis of risk factors for Alzheimer's disease in patients with and without normal tension glaucoma**

| Predictive variables            | Univariate analysis       |                | Multivariate analysis   |                |
|---------------------------------|---------------------------|----------------|-------------------------|----------------|
|                                 | Unadjusted HR<br>(95% CI) | <i>P</i> value | Adjusted HR<br>(95% CI) | <i>P</i> value |
| <b>NTG</b> (Yes vs. No)         | 1.66 (1.55–1.79)          | <0.0001        | 1.52 (1.41–1.63)        | <0.0001        |
| <b>Age</b>                      |                           |                |                         |                |
| <55                             | Reference                 |                | Reference               |                |
| 55-65                           | 5.40 (4.30–6.78)          | <0.0001        | 4.97 (3.95–6.24)        | 0.0002         |
| 65-75                           | 20.25 (16.45–24.94)       | <0.0001        | 17.33 (14.02–21.42)     | <0.0001        |
| ≥75                             | 47.85 (38.92–58.82)       | <0.0001        | 38.85 (31.43–48.02)     | <0.0001        |
| <b>Gender</b> (Male vs. Female) | 0.81 (0.76–0.87)          | <0.0001        | 0.92 (0.86–0.98)        | 0.01           |
| <b>Comorbidities</b>            |                           |                |                         |                |
| Diabetes                        | 1.56 (1.45–1.66)          | <0.0001        | 1.05 (0.98–1.13)        | 0.20           |
| Hypertension                    | 2.98 (2.74–3.23)          | <0.0001        | 1.07 (0.97–1.17)        | 0.17           |
| Hyperlipidemia                  | 1.30 (1.21–1.39)          | <0.0001        | 1.01 (0.94–1.09)        | 0.79           |
| Coronary artery disease         | 2.27 (2.13–2.42)          | <0.0001        | 1.06 (0.99–1.14)        | 0.10           |
| Stroke                          | 3.39 (3.16–3.64)          | <0.0001        | 1.73 (1.61–1.87)        | <0.0001        |

NTG indicates normal tension glaucoma; HR indicates hazard ratio; CI indicates confidence interval; In the multivariate analysis, all the other variables listed in the table were included for adjustment.

### Risk factors for AD among NTG patients

Table 3 displays the risk factors for AD among NTG patients. Older age, female gender, and stroke significantly increased the risk of developing AD among NTG patients in univariate as well as multivariate cox regression analyses. Moreover, when we compared the effects of different types of glaucoma eye drops, none of them were significant risk factors or protective factors for AD. Furthermore, NTG patients were divided into younger and older subgroups. The same cox regression analyses were applied separately to the two subgroups (supplementary Table 2). Among NTG patients younger than 65, female and stroke were found to be significant risk factors for AD. Among NTG patients older than 65, the significant risk factors for AD were female, stroke, and diabetes.

**Table 3. Analysis of risk factors for AD among patients with normal tension glaucoma**

| Predictive variables                          | Univariate analysis       |                 | Multivariate analysis   |                 |
|-----------------------------------------------|---------------------------|-----------------|-------------------------|-----------------|
|                                               | Unadjusted HR<br>(95% CI) | <i>p</i> -value | Adjusted HR<br>(95% CI) | <i>p</i> -value |
| <b>Age</b>                                    |                           |                 |                         |                 |
| <55                                           | Reference                 |                 | Reference               |                 |
| 55-65                                         | 5.14 (3.48-7.59)          | <0.0001         | 4.74 (3.20-7.02)        | <0.0001         |
| 65-75                                         | 14.65 (10.20-21.04)       | <0.0001         | 12.83 (8.85-18.60)      | <0.0001         |
| ≥75                                           | 34.06 (23.83-48.68)       | <0.0001         | 29.01 (20.04-42.00)     | <0.0001         |
| <b>Gender (Male vs. Female)</b>               | 0.93 (0.83–1.06)          | 0.28            | 0.81 (0.71-0.92)        | 0.0009          |
| <b>Comorbidities</b>                          |                           |                 |                         |                 |
| Diabetes                                      | 1.36 (1.20-1.54)          | <0.0001         | 1.01 (0.88-1.15)        | 0.91            |
| Hypertension                                  | 2.99 (2.54–3.52)          | <0.0001         | 1.11 (0.93-1.32)        | 0.27            |
| Hyperlipidemia                                | 1.21 (1.07-1.37)          | 0.002           | 1.08 (0.95-1.23)        | 0.23            |
| Coronary artery disease                       | 2.21 (1.95-2.50)          | <0.0001         | 1.14 (0.99-1.30)        | 0.06            |
| Stroke                                        | 2.55 (2.21–2.94)          | <0.0001         | 1.38 (1.19-1.60)        | <0.0001         |
| <b>Types of glaucoma eye drops</b>            |                           |                 |                         |                 |
| α-agonist (Yes vs. No)                        | 1.42 (1.20-1.69)          | <0.0001         | 0.93 (0.82-1.06)        | 0.25            |
| Carbonic anhydrase inhibitors<br>(Yes vs. No) | 0.80 (0.61-1.04)          | 0.09            | 0.89 (0.74-1.06)        | 0.19            |
| β-blocker (Yes vs. No)                        | 1.19 (0.83-1.69)          | 0.34            | 0.85 (0.70-1.04)        | 0.12            |
| Parasympathomimetics<br>(pilocarpine)         | 1.26 (0.52-3.02)          | 0.61            | 0.96 (0.68-1.36)        | 0.83            |
| Prostaglandin analogs (Yes<br>vs. No)         | 1.03 (0.88-1.21)          | 0.72            | 1.07 (0.93-1.23)        | 0.37            |

HR indicates hazard ratio; CI indicates confidence interval; AC indicates angle closure. In the multivariate analysis, all the other variables listed in the table were included for adjustment.

## Discussion

We conducted a 13-year cohort study on population-based data from the Taiwan NHIRD. Compared with those without glaucoma, patients with NTG had a significantly higher risk (HR = 1.52) of developing AD after adjustment for age, gender, and comorbidities. Among NTG patients, older age, female gender, and stroke were significant risk factors for developing AD. However, the types of glaucoma eye drops were not risk factors or protective factors for AD among NTG patients.

Both NTG and high-tension glaucoma (HTG) belong to POAG. They present a continuum of POAG, in which the underlying mechanism shifts from predominantly elevated IOP in HTG to hemodynamic changes in NTG. Lee et al. conducted a cross-sectional study in South Korea and found that NTG patients had a significantly higher prevalence of hypertension, hyperlipidemia, ischemic heart disease, and metabolic syndrome.<sup>31</sup> These findings are compatible with our findings in Table 1. Compared with non-NTG patients, we also found that NTG patients tended to be older and female predominant. These findings are consistent with the previous literature.<sup>16</sup>

Previous studies regarding the relationship between glaucoma and AD have mostly investigated the association between POAG and AD.<sup>27-28, 32-34</sup> Nevertheless, POAG includes NTG and HTG, which are distinctive disease entities. NTG has different features compared to HTG, such as IOP-independent mechanisms and characteristic patterns of structural/functional damage.<sup>31, 35</sup> Therefore, it is not clear enough to regard NTG and HTG as one to evaluate the subsequent risk of AD. One strength of our study is that we specified the association between NTG and AD. To the best of our knowledge, only one previous population-based study focused on the

1  
2  
3 relationship between NTG and AD.<sup>29</sup> Bach-Holm et al. tracked 69 NTG patients in  
4 Denmark for a mean follow-up period of 12.7 years and did not find any significantly  
5 higher risk of developing dementia/AD compared with the general population. In  
6 fact, none of those 69 NTG patients subsequently developed AD. Statistically, the  
7 case numbers were too small to perform analyses effectively. It is another strength  
8 of our study that we included over 15,000 NTG patients from our nationwide  
9 database. Thus, we have a higher statistical power to draw convincing conclusions.

10  
11  
12  
13  
14  
15  
16  
17  
18 Another strength of our study is the adjustment for possible confounders in the  
19 Cox regression. Table 2 shows that the unadjusted HR for AD is 1.66 (95% CI: 1.55 to  
20 1.79) in the NTG group compared with the comparison group. Age, female gender,  
21 and vascular/metabolic comorbidities have been reported to be risk factors of both  
22 NTG and AD;<sup>16, 31, 36-37</sup> thus, these should be adjusted for as confounders to address  
23 the association between NTG and AD. Due to the completeness of our database, we  
24 obtained inpatient and outpatient medical records of the whole population. After  
25 adjustment for confounders, the association between NTG and AD was still  
26 significant (HR= 1.52; 95% CI: 1.41 to 1.63), providing evidence that the significant  
27 association between NTG and AD is a real phenomenon.

28  
29  
30  
31  
32  
33  
34  
35  
36  
37  
38  
39 Another strength is that we concentrated on the NTG group to investigate the  
40 risk factors for AD. Table 3 shows that among NTG patients, age, female gender, and  
41 stroke significantly increased the risk of subsequent AD. To the best of our  
42 knowledge, this is the first study to find factors that were associated with an  
43 increased risk of subsequent AD among NTG patients. This finding reminds us to be  
44 alert when we identify these high-risk factors among patients with NTG.

45  
46  
47  
48  
49  
50  
51  
52 Previous animal and in vitro studies have revealed that Betaxolol and  
53 Brimonidine eye drops are neuroprotective.<sup>38-42</sup> However, in our study, none of the  
54 glaucoma eye drops were identified as risk factors or protective factors for AD  
55  
56  
57  
58  
59  
60

1  
2  
3 among the NTG patients. Further studies are warranted to investigate the issue.  
4

5 We also performed subgroup analyzes according to age in the cox regression  
6 (Supplementary Table 1, Supplementary Table 2). In Table 2 and Table 3, diabetes  
7 was not a significant risk factor for AD among all the enrolled subjects (adjusted  
8 HR=1.05, 95% CI: 0.98-1.13) and among NTG patients (adjusted HR=1.01, 95% CI:  
9 0.88-1.15). However, previous studies found diabetes to be a significant risk factors  
10 for AD among the elderly.<sup>43-45</sup> To unravel the possible interaction effect of age and  
11 diabetes on AD, we performed the cox regression in subgroups according to younger  
12 age and older age. Among those over 65 years, diabetes significantly increased the  
13 risk of AD, which was compatible with the results of previous studies.<sup>43-45</sup>  
14  
15  
16  
17  
18  
19  
20  
21  
22  
23

24 In our next studies investigating the association between HTG and AD, as well as  
25 the relationship between NTG and dementia other than AD, the adjusted HR is 1.12  
26 (95% CI: 0.89-1.36) and 1.21 (95% CI: 0.90-1.49), respectively (the detailed results  
27 will be presented in the future). Thus, the significantly positive association was  
28 specifically exhibited between NTG and AD. One of the possible explanation is the  
29 common pathogenesis of neurotoxic substances in NTG and AD. Abnormal  
30 hyperphosphorylated tau and  $\beta$ -amyloid, are linked to retinal ganglion cell death in  
31 glaucoma and contribute to neuronal apoptosis in AD.<sup>46</sup> Another pathological  
32 explanation may be the low intracranial pressure (ICP) in both NTG and AD. Low ICP  
33 leads to cerebrospinal fluid (CSF) circulatory failure and accumulation of neurotoxins  
34 in CSF as well as along the optic nerve, thus playing a role in NTG and AD.<sup>47-50</sup>  
35  
36  
37  
38  
39  
40  
41  
42  
43  
44  
45  
46  
47

48 From our study, we can not conclude that NTG or its treatment causes AD,  
49 because the association of the two diseases may be resulted from their common  
50 pathogenesis. In Figure 1, the two lines converge from the outset without any latent  
51 period, suggesting the same risk factors that influence NTG also influence AD.  
52  
53  
54  
55  
56  
57  
58  
59  
60

1  
2  
3 Further studies are warranted to elucidate the explanations of relationship between  
4  
5 NTG and AD.  
6

7 A limitation of our study is that NHIRD does not provide information regarding  
8  
9 the severity of visual field defects or visual acuity. Therefore, we could not evaluate  
10  
11 whether the risk of AD was positively correlated with the severity of NTG or visual  
12  
13 impairment. Future studies including chart review will be conducted to consider  
14  
15 these factors. Another limitation is NTG or AD may be under-diagnosed in database  
16  
17 studies. Besides, those with NTG may have more healthcare visits, leading to a higher  
18  
19 chance of being diagnosed AD. Fortunately, in our healthcare system, NHI covers the  
20  
21 fee of the comprehensive, regular health checkup of all beneficiaries. Individuals  
22  
23 over 40 years are compelled to receive health checkup once per 3 years and those  
24  
25 over 65 years should have once per year. The high accessibility of healthcare ensures  
26  
27 the similar chance of diagnosis in NTGs and comparisons if they had AD. It is proved  
28  
29 by the similar frequencies of healthcare professionals contacts (excluding  
30  
31 ophthalmologists contacts) in NTG and control subjects ( $10.2 \pm 7.6$  vs.  $10.0 \pm 7.7$  times  
32  
33 per year;  $p=0.08$ ). Even if NTG and AD are under-diagnosed, the misclassification is  
34  
35 non-differential and causes toward-the-null bias. Therefore, the positive association  
36  
37 between NTG and AD is true and more prominent in real situation.  
38  
39  
40

41 The findings from our study have both clinical and public health implications.  
42  
43 Clinically, when treating NTG patients, ophthalmologists need to focus not only on  
44  
45 the medical aspects of NTG but also on changes in cognitive function or memory.  
46  
47 NTG patients at a higher risk for AD, such as older patients, female patients, and  
48  
49 patients with stroke, should be referred to a neurologist or psychiatrist if early signs  
50  
51 of AD become apparent. From a public health perspective, policy makers are  
52  
53 encouraged to enforce screening for AD risk in patients with NTG and to provide  
54  
55 more substantial and integrated care.  
56  
57  
58  
59  
60

1  
2  
3  
4  
5  
6  
7  
8  
9  
10  
11  
12  
13  
14  
15  
16  
17  
18  
19  
20  
21  
22  
23  
24  
25  
26  
27  
28  
29  
30  
31  
32  
33  
34  
35  
36  
37  
38  
39  
40  
41  
42  
43  
44  
45  
46  
47  
48  
49  
50  
51  
52  
53  
54  
55  
56  
57  
58  
59  
60

For peer review only

## References

1. Gordon MO, Beiser JA, Brandt JD, et al. The Ocular Hypertension Treatment Study: baseline factors that predict the onset of primary open-angle glaucoma. *Archives of ophthalmology* 2002;120(6):714-20.
2. Sommer A, Tielsch JM, Katz J, et al. Relationship between intraocular pressure and primary open angle glaucoma among white and black Americans. The Baltimore Eye Survey. *Archives of ophthalmology* 1991;109(8):1090-5.
3. Weih LM, Nanjan M, McCarty CA, et al. Prevalence and predictors of open-angle glaucoma: results from the visual impairment project. *Ophthalmology* 2001;108(11):1966-72.
4. Bonomi L, Marchini G, Marraffa M, et al. Prevalence of glaucoma and intraocular pressure distribution in a defined population. The Egna-Neumarkt Study. *Ophthalmology* 1998;105(2):209-15.
5. Cho HK, Kee C. Population-based glaucoma prevalence studies in Asians. *Survey of ophthalmology* 2014;59(4):434-47.
6. Klein BE, Klein R, Sponsel WE, et al. Prevalence of glaucoma. The Beaver Dam Eye Study. *Ophthalmology* 1992;99(10):1499-504.
7. Rotchford AP, Johnson GJ. Glaucoma in Zulus: a population-based cross-sectional survey in a rural district in South Africa. *Archives of ophthalmology* 2002;120(4):471-8.
8. Caprioli J, Coleman AL. Blood pressure, perfusion pressure, and glaucoma. *Am J Ophthalmol* 2010;149(5):704-12.
9. Flammer J, Konieczka K, Flammer AJ. The primary vascular dysregulation syndrome: implications for eye diseases. *The EPMA journal* 2013;4(1):14.
10. Mozaffarieh M, Flammer J. New insights in the pathogenesis and treatment of normal tension glaucoma. *Current opinion in pharmacology* 2013;13(1):43-9.
11. Park HY, Park SH, Park CK. Central visual field progression in normal-tension glaucoma patients with autonomic dysfunction. *Investigative ophthalmology & visual science* 2014;55(4):2557-63.
12. Siaudvytyte L, Januleviciene I, Daveckaite A, et al. Literature review and meta-analysis of translaminal pressure difference in open-angle glaucoma. *Eye* 2015;29(10):1242-50.
13. Mroczkowska S, Benavente-Perez A, Negi A, et al. Primary open-angle glaucoma vs normal-tension glaucoma: the vascular perspective. *JAMA ophthalmology* 2013;131(1):36-43.
14. Burns A, Iliffe S. Alzheimer's disease. *BMJ* 2009;338:b158.
15. Tiraboschi P, Hansen LA, Thal LJ, et al. The importance of neuritic plaques and



- 1  
2  
3 tangles to the development and evolution of AD. *Neurology*  
4 2004;62(11):1984-9.  
5  
6 16. Mallick J, Devi L, Malik PK, et al. Update on Normal Tension Glaucoma. *Journal of*  
7 *ophthalmic & vision research* 2016;11(2):204-8.  
8  
9 17. Berisha F, Feke GT, Trempe CL, et al. Retinal abnormalities in early Alzheimer's  
10 disease. *Investigative ophthalmology & visual science* 2007;48(5):2285-9.  
11  
12 18. Guo L, Duggan J, Cordeiro MF. Alzheimer's disease and retinal neurodegeneration.  
13 *Current Alzheimer research* 2010;7(1):3-14.  
14  
15 19. Kesler A, Vakhapova V, Korczyn AD, et al. Retinal thickness in patients with mild  
16 cognitive impairment and Alzheimer's disease. *Clinical neurology and*  
17 *neurosurgery* 2011;113(7):523-6.  
18  
19 20. Sadun AA, Bassi CJ. Optic nerve damage in Alzheimer's disease. *Ophthalmology*  
20 1990;97(1):9-17.  
21  
22 21. Vickers JC, Craig JE, Stankovich J, et al. The apolipoprotein epsilon4 gene is  
23 associated with elevated risk of normal tension glaucoma. *Molecular vision*  
24 2002;8:389-93.  
25  
26 22. Liu YH, Tian T. Hypothesis of optineurin as a new common risk factor in  
27 normal-tension glaucoma and Alzheimer's disease. *Medical hypotheses*  
28 2011;77(4):591-2.  
29  
30 23. Osawa T, Mizuno Y, Fujita Y, et al. Optineurin in neurodegenerative diseases.  
31 *Neuropathology : official journal of the Japanese Society of Neuropathology*  
32 2011;31(6):569-74.  
33  
34 24. Tamura H, Kawakami H, Kanamoto T, et al. High frequency of open-angle  
35 glaucoma in Japanese patients with Alzheimer's disease. *Journal of the*  
36 *neurological sciences* 2006;246(1-2):79-83.  
37  
38 25. Bayer AU, Ferrari F, Erb C. High occurrence rate of glaucoma among patients with  
39 Alzheimer's disease. *European neurology* 2002;47(3):165-8.  
40  
41 26. Bayer AU, Keller ON, Ferrari F, et al. Association of glaucoma with  
42 neurodegenerative diseases with apoptotic cell death: Alzheimer's disease  
43 and Parkinson's disease. *American Journal of Ophthalmology*  
44 2002;133(1):135-37.  
45  
46 27. Helmer C, Malet F, Rougier MB, et al. Is there a link between open-angle  
47 glaucoma and dementia? The Three-City-Alienor cohort. *Annals of neurology*  
48 2013;74(2):171-9.  
49  
50 28. Lin IC, Wang YH, Wang TJ, et al. Glaucoma, Alzheimer's disease, and Parkinson's  
51 disease: an 8-year population-based follow-up study. *PloS one*  
52 2014;9(9):e108938.  
53  
54 29. Bach-Holm D, Kessing SV, Mogensen U, et al. Normal tension glaucoma and  
55  
56  
57  
58  
59

- 1  
2  
3 Alzheimer disease: comorbidity? *Acta ophthalmologica* 2012;90(7):683-5.  
4  
5 30. Ekstrom C, Kilander L. Open-angle glaucoma and Alzheimer's disease: a  
6 population-based 30-year follow-up study. *Acta ophthalmologica*  
7 2017;95(2):e157-e58.  
8  
9 31. Lee SH, Kim GA, Lee W, et al. Vascular and metabolic comorbidities in open-angle  
10 glaucoma with low- and high-teen intraocular pressure: a cross-sectional  
11 study from South Korea. 2017;95(7):e564-e74.  
12  
13 32. Kessing LV, Lopez AG, Andersen PK, et al. No increased risk of developing  
14 Alzheimer disease in patients with glaucoma. *Journal of glaucoma*  
15 2007;16(1):47-51.  
16  
17 33. Ou Y, Grossman DS, Lee PP, et al. Glaucoma, Alzheimer disease and other  
18 dementia: a longitudinal analysis. *Ophthalmic epidemiology*  
19 2012;19(5):285-92.  
20  
21 34. Keenan TD, Goldacre R, Goldacre MJ. Associations between primary open angle  
22 glaucoma, Alzheimer's disease and vascular dementia: record linkage study.  
23 *The British journal of ophthalmology* 2015;99(4):524-7.  
24  
25 35. Kim KE, Park KH. Update on the Prevalence, Etiology, Diagnosis, and Monitoring  
26 of Normal-Tension Glaucoma. *Asia-Pacific journal of ophthalmology*  
27 *(Philadelphia, Pa)* 2016;5(1):23-31.  
28  
29 36. Hersi M, Irvine B, Gupta P, et al. Risk factors associated with the onset and  
30 progression of Alzheimer's disease: A systematic review of the evidence.  
31 *Neurotoxicology* 2017;61:143-87.  
32  
33 37. Stefanova E, Pavlovic A, Jovanovic Z, et al. Vascular risk factors in Alzheimer's  
34 disease - preliminary report. *Journal of the neurological sciences*  
35 2012;322(1-2):166-9.  
36  
37 38. Baptiste DC, Hartwick AT, Jollimore CA, et al. Comparison of the neuroprotective  
38 effects of adrenoceptor drugs in retinal cell culture and intact retina.  
39 *Investigative ophthalmology & visual science* 2002;43(8):2666-76.  
40  
41 39. Lee D, Kim KY, Noh YH, et al. Brimonidine blocks glutamate excitotoxicity-induced  
42 oxidative stress and preserves mitochondrial transcription factor a in ischemic  
43 retinal injury. *PLoS one* 2012;7(10):e47098.  
44  
45 40. Osborne NN, DeSantis L, Bae JH, et al. Topically applied betaxolol attenuates  
46 NMDA-induced toxicity to ganglion cells and the effects of ischaemia to the  
47 retina. *Experimental eye research* 1999;69(3):331-42.  
48  
49 41. Tatton W, Chen D, Chalmers-Redman R, et al. Hypothesis for a common basis for  
50 neuroprotection in glaucoma and Alzheimer's disease: anti-apoptosis by  
51 alpha-2-adrenergic receptor activation. *Survey of ophthalmology* 2003;48  
52 Suppl 1:S25-37.  
53  
54  
55  
56  
57  
58  
59

- 1  
2  
3 42. Wood JP, DeSantis L, Chao HM, et al. Topically applied betaxolol attenuates  
4 ischaemia-induced effects to the rat retina and stimulates BDNF mRNA.  
5 *Experimental eye research* 2001;72(1):79-86.  
6
- 7 43. Ahtiluoto S, Polvikoski T, Peltonen M, et al. Diabetes, Alzheimer disease, and  
8 vascular dementia: a population-based neuropathologic study. *Neurology*  
9 2010;75(13):1195-202. doi: 10.1212/WNL.0b013e3181f4d7f8 [published  
10 Online First: 2010/08/27]  
11
- 12 44. Ohara T, Doi Y, Ninomiya T, et al. Glucose tolerance status and risk of dementia in  
13 the community: the Hisayama study. *Neurology* 2011;77(12):1126-34. doi:  
14 10.1212/WNL.0b013e31822f0435 [published Online First: 2011/09/21]  
15
- 16 45. Qiu C, Xu W, Winblad B, et al. Vascular risk profiles for dementia and Alzheimer's  
17 disease in very old people: a population-based longitudinal study. *Journal of*  
18 *Alzheimer's disease : JAD* 2010;20(1):293-300. doi: 10.3233/jad-2010-1361  
19 [published Online First: 2010/02/19]  
20
- 21 46. Jain S, Aref AA. Senile Dementia and Glaucoma: Evidence for a Common Link.  
22 *Journal of ophthalmic & vision research* 2015;10(2):178-83. doi:  
23 10.4103/2008-322x.163766 [published Online First: 2015/10/02]  
24
- 25 47. Wostyn P, De Groot V, Van Dam D, et al. Senescent changes in cerebrospinal fluid  
26 circulatory physiology and their role in the pathogenesis of normal-tension  
27 glaucoma. *Am J Ophthalmol* 2013;156(1):5-14.e2. doi:  
28 10.1016/j.ajo.2013.03.003 [published Online First: 2013/04/24]  
29
- 30 48. Serot JM, Zmudka J, Jouanny P. A possible role for CSF turnover and choroid  
31 plexus in the pathogenesis of late onset Alzheimer's disease. *Journal of*  
32 *Alzheimer's disease : JAD* 2012;30(1):17-26. doi: 10.3233/jad-2012-111964  
33 [published Online First: 2012/02/22]  
34
- 35 49. Preston JE. Ageing choroid plexus-cerebrospinal fluid system. *Microscopy*  
36 *research and technique* 2001;52(1):31-7. doi:  
37 10.1002/1097-0029(20010101)52:1<31::aid-jemt5>3.0.co;2-t [published  
38 Online First: 2001/01/03]  
39
- 40 50. Silverberg GD, Mayo M, Saul T, et al. Alzheimer's disease, normal-pressure  
41 hydrocephalus, and senescent changes in CSF circulatory physiology: a  
42 hypothesis. *The Lancet Neurology* 2003;2(8):506-11. [published Online First:  
43 2003/07/25]  
44  
45  
46  
47  
48  
49  
50  
51  
52  
53  
54  
55  
56  
57  
58  
59  
60

## Figure Legends

**Fig. 1. Kaplan-Meier curves for Alzheimer's disease among NTG patients and the comparison group.** The black line represents the NTG group and the gray line represents the comparison group.

For peer review only

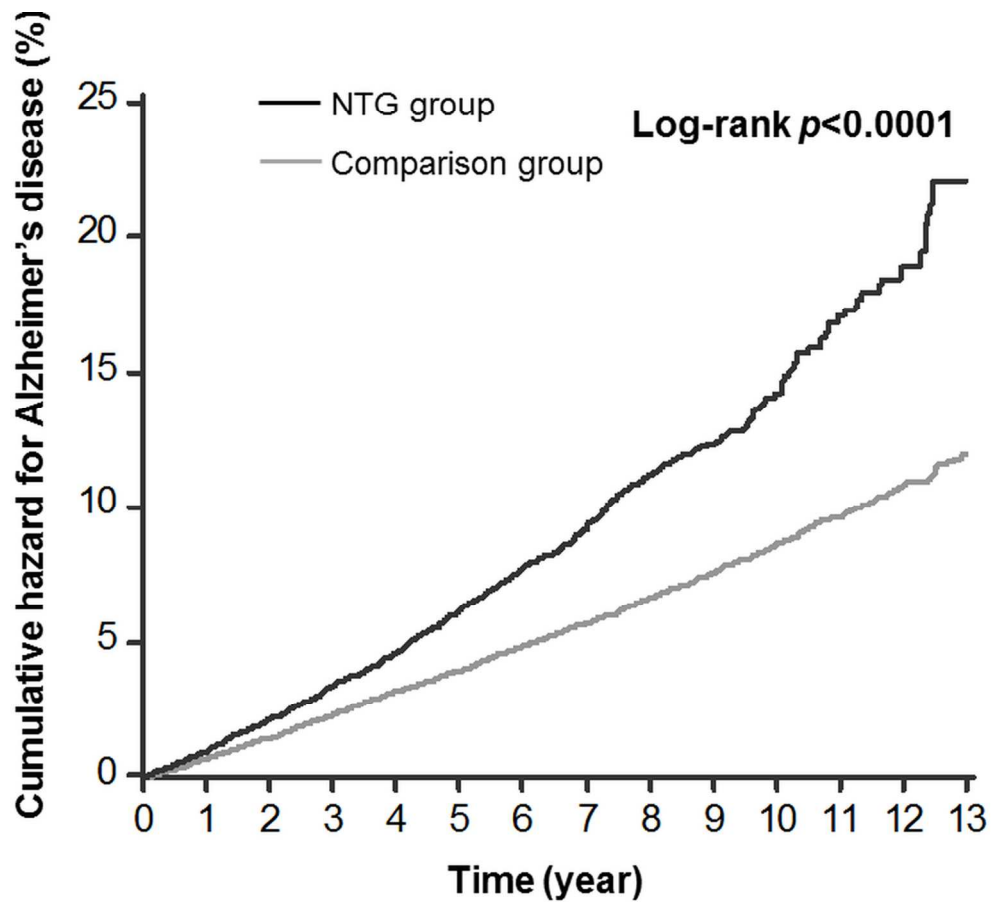

Fig. 1. Kaplan-Meier curves for Alzheimer's disease among NTG patients and the comparison group. The black line represents the NTG group and the gray line represents the comparison group.

135x120mm (300 x 300 DPI)

**Supplementary Table 1. Subgroup analysis of risk factors for Alzheimer's disease in patients with and without normal tension glaucoma, stratified by age**

| Predictive variables            | Age<65                  |                | Age≥65                  |                |
|---------------------------------|-------------------------|----------------|-------------------------|----------------|
|                                 | Adjusted HR<br>(95% CI) | <i>P</i> value | Adjusted HR<br>(95% CI) | <i>P</i> value |
| <b>NTG</b> (Yes vs. No)         | 1.98 (1.63–2.42)        | <0.0001        | 1.50 (1.39–1.63)        | <0.0001        |
| <b>Gender</b> (Male vs. Female) | 0.68 (0.56–0.82)        | <0.0001        | 0.93 (0.86–0.99)        | 0.03           |
| <b>Comorbidities</b>            |                         |                |                         |                |
| Diabetes                        | 1.19 (0.96–1.47)        | 0.12           | 1.02 (1.01–1.12)        | 0.03           |
| Hypertension                    | 1.05 (0.84–1.31)        | 0.69           | 1.09 (0.98–1.21)        | 0.10           |
| Hyperlipidemia                  | 1.22 (0.93–1.59)        | 0.15           | 1.01 (0.99–1.18)        | 0.08           |
| Coronary artery disease         | 1.26 (0.94–1.65)        | 0.12           | 1.07 (0.99–1.13)        | 0.08           |
| Stroke                          | 4.19 (3.30–5.30)        | <0.0001        | 1.73 (1.60–1.87)        | <0.0001        |

NTG indicates normal tension glaucoma; HR indicates hazard ratio; CI indicates confidence interval; all the other variables listed in the table were included for adjustment.

**Supplementary Table 2. Subgroup analysis of risk factors for AD among patients with normal tension glaucoma, stratified by age**

| Predictive variables                          | Age<65                  |                 | Age≥65                  |                 |
|-----------------------------------------------|-------------------------|-----------------|-------------------------|-----------------|
|                                               | Adjusted HR<br>(95% CI) | <i>p</i> -value | Adjusted HR<br>(95% CI) | <i>p</i> -value |
| <b>Gender (Male vs. Female)</b>               | 0.57 (0.41–0.80)        | 0.001           | 0.83 (0.72-0.94)        | 0.005           |
| <b>Comorbidities</b>                          |                         |                 |                         |                 |
| Diabetes                                      | 1.01 (0.70-1.46)        | 0.97            | 1.17 (1.05-1.12)        | <0.0001         |
| Hypertension                                  | 1.04 (0.72–1.22)        | 0.6             | 1.24 (0.99-1.62)        | 0.06            |
| Hyperlipidemia                                | 1.45 (0.94-2.18)        | 0.09            | 1.07 (0.94-1.22)        | 0.30            |
| Coronary artery disease                       | 1.37 (0.91-2.03)        | 0.14            | 1.13 (0.98-1.30)        | 0.10            |
| Stroke                                        | 2.91 (1.87–4.54)        | <0.0001         | 1.35 (1.16-1.58)        | 0.0002          |
| <b>Types of glaucoma eye drops</b>            |                         |                 |                         |                 |
| α-agonist (Yes vs. No)                        | 0.98 (0.79-1.56)        | 0.53            | 0.91 (0.79-1.04)        | 0.17            |
| Carbonic anhydrase inhibitors<br>(Yes vs. No) | 0.87 (0.53-1.42)        | 0.57            | 0.90 (0.75-1.10)        | 0.30            |
| β-blocker (Yes vs. No)                        | 0.71 (0.43-1.17)        | 0.18            | 0.90 (0.77-1.02)        | 0.09            |
| Parasympathomimetics<br>(pilocarpine)         | 0.78 (0.29-2.13)        | 0.63            | 1.04 (0.72-1.30)        | 0.83            |
| Prostaglandin analogs (Yes<br>vs. No)         | 1.04 (0.71-1.51)        | 0.84            | 1.08 (0.94-1.22)        | 0.30            |

HR indicates hazard ratio; CI indicates confidence interval; all the other variables listed in the table were included for adjustment.

**STROBE 2007 (v4) checklist of items to be included in reports of observational studies in epidemiology\***  
**Checklist for cohort, case-control, and cross-sectional studies (combined)**

| Section/Topic             | Item # | Recommendation                                                                                                                                                                                                                                                                                                                                                                                                                                                         | Reported on page # |
|---------------------------|--------|------------------------------------------------------------------------------------------------------------------------------------------------------------------------------------------------------------------------------------------------------------------------------------------------------------------------------------------------------------------------------------------------------------------------------------------------------------------------|--------------------|
| Title and abstract        | 1      | (a) Indicate the study's design with a commonly used term in the title or the abstract                                                                                                                                                                                                                                                                                                                                                                                 | 3                  |
|                           |        | (b) Provide in the abstract an informative and balanced summary of what was done and what was found                                                                                                                                                                                                                                                                                                                                                                    | 3-4                |
| <b>Introduction</b>       |        |                                                                                                                                                                                                                                                                                                                                                                                                                                                                        |                    |
| Background/rationale      | 2      | Explain the scientific background and rationale for the investigation being reported                                                                                                                                                                                                                                                                                                                                                                                   | 6-7                |
| Objectives                | 3      | State specific objectives, including any pre-specified hypotheses                                                                                                                                                                                                                                                                                                                                                                                                      | 7                  |
| <b>Methods</b>            |        |                                                                                                                                                                                                                                                                                                                                                                                                                                                                        |                    |
| Study design              | 4      | Present key elements of study design early in the paper                                                                                                                                                                                                                                                                                                                                                                                                                | 8                  |
| Setting                   | 5      | Describe the setting, locations, and relevant dates, including periods of recruitment, exposure, follow-up, and data collection                                                                                                                                                                                                                                                                                                                                        | 8                  |
| Participants              | 6      | (a) <i>Cohort study</i> —Give the eligibility criteria, and the sources and methods of selection of participants. Describe methods of follow-up<br><i>Case-control study</i> —Give the eligibility criteria, and the sources and methods of case ascertainment and control selection. Give the rationale for the choice of cases and controls<br><i>Cross-sectional study</i> —Give the eligibility criteria, and the sources and methods of selection of participants | 8-9                |
|                           |        | (b) <i>Cohort study</i> —For matched studies, give matching criteria and number of exposed and unexposed<br><i>Case-control study</i> —For matched studies, give matching criteria and the number of controls per case                                                                                                                                                                                                                                                 | 8                  |
| Variables                 | 7      | Clearly define all outcomes, exposures, predictors, potential confounders, and effect modifiers. Give diagnostic criteria, if applicable                                                                                                                                                                                                                                                                                                                               | 9                  |
| Data sources/ measurement | 8*     | For each variable of interest, give sources of data and details of methods of assessment (measurement). Describe comparability of assessment methods if there is more than one group                                                                                                                                                                                                                                                                                   | 8                  |
| Bias                      | 9      | Describe any efforts to address potential sources of bias                                                                                                                                                                                                                                                                                                                                                                                                              | 9                  |
| Study size                | 10     | Explain how the study size was arrived at                                                                                                                                                                                                                                                                                                                                                                                                                              | 9                  |
| Quantitative variables    | 11     | Explain how quantitative variables were handled in the analyses. If applicable, describe which groupings were chosen and why                                                                                                                                                                                                                                                                                                                                           | 9                  |
| Statistical methods       | 12     | (a) Describe all statistical methods, including those used to control for confounding                                                                                                                                                                                                                                                                                                                                                                                  | 9                  |
|                           |        | (b) Describe any methods used to examine subgroups and interactions                                                                                                                                                                                                                                                                                                                                                                                                    | 9                  |
|                           |        | (c) Explain how missing data were addressed                                                                                                                                                                                                                                                                                                                                                                                                                            | 9                  |
|                           |        | (d) <i>Cohort study</i> —If applicable, explain how loss to follow-up was addressed<br><i>Case-control study</i> —If applicable, explain how matching of cases and controls was addressed                                                                                                                                                                                                                                                                              | 8                  |



|                          |     |                                                                                                                                                                                                              |       |
|--------------------------|-----|--------------------------------------------------------------------------------------------------------------------------------------------------------------------------------------------------------------|-------|
|                          |     | <i>Cross-sectional study</i> —If applicable, describe analytical methods taking account of sampling strategy                                                                                                 |       |
|                          |     | (e) Describe any sensitivity analyses                                                                                                                                                                        | 9     |
| <b>Results</b>           |     |                                                                                                                                                                                                              |       |
| Participants             | 13* | (a) Report numbers of individuals at each stage of study—eg numbers potentially eligible, examined for eligibility, confirmed eligible, included in the study, completing follow-up, and analysed            | 10    |
|                          |     | (b) Give reasons for non-participation at each stage                                                                                                                                                         | 10    |
|                          |     | (c) Consider use of a flow diagram                                                                                                                                                                           | 10    |
| Descriptive data         | 14* | (a) Give characteristics of study participants (eg demographic, clinical, social) and information on exposures and potential confounders                                                                     | 10-11 |
|                          |     | (b) Indicate number of participants with missing data for each variable of interest                                                                                                                          | 11    |
|                          |     | (c) <i>Cohort study</i> —Summarise follow-up time (eg, average and total amount)                                                                                                                             | 11    |
| Outcome data             | 15* | <i>Cohort study</i> —Report numbers of outcome events or summary measures over time                                                                                                                          | 13    |
|                          |     | <i>Case-control study</i> —Report numbers in each exposure category, or summary measures of exposure                                                                                                         | NA    |
|                          |     | <i>Cross-sectional study</i> —Report numbers of outcome events or summary measures                                                                                                                           | NA    |
| Main results             | 16  | (a) Give unadjusted estimates and, if applicable, confounder-adjusted estimates and their precision (eg, 95% confidence interval). Make clear which confounders were adjusted for and why they were included | 11    |
|                          |     | (b) Report category boundaries when continuous variables were categorized                                                                                                                                    | 11    |
|                          |     | (c) If relevant, consider translating estimates of relative risk into absolute risk for a meaningful time period                                                                                             | NA    |
| Other analyses           | 17  | Report other analyses done—eg analyses of subgroups and interactions, and sensitivity analyses                                                                                                               | 14    |
| <b>Discussion</b>        |     |                                                                                                                                                                                                              |       |
| Key results              | 18  | Summarise key results with reference to study objectives                                                                                                                                                     | 15    |
| Limitations              | 19  | Discuss limitations of the study, taking into account sources of potential bias or imprecision. Discuss both direction and magnitude of any potential bias                                                   | 17    |
| Interpretation           | 20  | Give a cautious overall interpretation of results considering objectives, limitations, multiplicity of analyses, results from similar studies, and other relevant evidence                                   | 15-16 |
| Generalisability         | 21  | Discuss the generalisability (external validity) of the study results                                                                                                                                        | 17    |
| <b>Other information</b> |     |                                                                                                                                                                                                              |       |
| Funding                  | 22  | Give the source of funding and the role of the funders for the present study and, if applicable, for the original study on which the present article is based                                                | 2     |

\*Give information separately for cases and controls in case-control studies and, if applicable, for exposed and unexposed groups in cohort and cross-sectional studies.

**Note:** An Explanation and Elaboration article discusses each checklist item and gives methodological background and published examples of transparent reporting. The STROBE checklist is best used in conjunction with this article (freely available on the Web sites of PLoS Medicine at <http://www.plosmedicine.org/>, Annals of Internal Medicine at <http://www.annals.org/>, and Epidemiology at <http://www.epidem.com/>). Information on the STROBE Initiative is available at [www.strobe-statement.org](http://www.strobe-statement.org).

# BMJ Open

## The Association between Normal Tension Glaucoma and the Risk of Alzheimer's Disease: A Nationwide Population-based Cohort study in Taiwan

|                                 |                                                                                                                                                                                                                                                                                                                                                                                                                                                                                                                                                                                                                                                                        |
|---------------------------------|------------------------------------------------------------------------------------------------------------------------------------------------------------------------------------------------------------------------------------------------------------------------------------------------------------------------------------------------------------------------------------------------------------------------------------------------------------------------------------------------------------------------------------------------------------------------------------------------------------------------------------------------------------------------|
| Journal:                        | <i>BMJ Open</i>                                                                                                                                                                                                                                                                                                                                                                                                                                                                                                                                                                                                                                                        |
| Manuscript ID                   | bmjopen-2018-022987.R2                                                                                                                                                                                                                                                                                                                                                                                                                                                                                                                                                                                                                                                 |
| Article Type:                   | Research                                                                                                                                                                                                                                                                                                                                                                                                                                                                                                                                                                                                                                                               |
| Date Submitted by the Author:   | 27-Jul-2018                                                                                                                                                                                                                                                                                                                                                                                                                                                                                                                                                                                                                                                            |
| Complete List of Authors:       | CHEN, YU-YEN; Taichung Veterans General Hospital, Department of Ophthalmology<br>Lai, Yun-ju; Puli Branch of Taichung Veterans General Hospital, Department of Internal Medicine<br>Yen, Yong-Fong ; Taipei City Hospital, Section of Infectious Diseases<br>Shen, Ying-Cheng; Taichung Veterans General Hospital, Department of Ophthalmology<br>Wang, Chun-Yuan; Taichung Veterans General Hospital, Department of Ophthalmology<br>Liang, Chiao-Ying; Taichung Veterans General Hospital, Department of Ophthalmology<br>Lin, Keng-Hung ; Taichung Veterans General Hospital, Department of Ophthalmology<br>Fan, Lir-Wan; University of Mississippi Medical Center |
| <b>Primary Subject Heading</b>: | Ophthalmology                                                                                                                                                                                                                                                                                                                                                                                                                                                                                                                                                                                                                                                          |
| Secondary Subject Heading:      | Epidemiology, Neurology                                                                                                                                                                                                                                                                                                                                                                                                                                                                                                                                                                                                                                                |
| Keywords:                       | normal tension glaucoma, Alzheimer's disease, risk factors, National Health Insurance Research Database, cohort study                                                                                                                                                                                                                                                                                                                                                                                                                                                                                                                                                  |
|                                 |                                                                                                                                                                                                                                                                                                                                                                                                                                                                                                                                                                                                                                                                        |

SCHOLARONE™  
Manuscripts

1  
2  
3  
4 **The Association between Normal Tension Glaucoma and the**  
5  
6 **Risk of Alzheimer's Disease: A Nationwide Population-based**  
7  
8 **Cohort study in Taiwan**  
9  
10

11  
12  
13 Yu-Yen Chen,<sup>1,2,3</sup> Yun-Ju Lai,<sup>2,4,5</sup> Yong-Fong Yen,<sup>2,6</sup> Ying-Cheng Shen,<sup>1</sup>

14  
15 Chun-Yuan Wang,<sup>1</sup> Chiao-Ying Liang,<sup>1</sup> Keng-Hung Lin,<sup>1</sup> Lir-Wan Fan<sup>7\*</sup>  
16  
17

18  
19 <sup>1</sup>Department of Ophthalmology, Taichung Veterans General Hospital, Taichung,  
20  
21 Taiwan.  
22

23  
24 <sup>2</sup>School of Medicine, National Yang-Ming University, Taipei, Taiwan.  
25

26  
27 <sup>3</sup>Community Medicine Research Center and Institute of Public Health, National  
28  
29 Yang-Ming University, Taipei, Taiwan.

30  
31 <sup>4</sup>Division of Endocrinology and Metabolism, Department of Internal Medicine, Puli  
32  
33 Branch of Taichung Veterans General Hospital, Nantou, Taiwan

34  
35 <sup>5</sup>Department of Exercise Health Science, National Taiwan University of Sport,  
36  
37 Taichung, Taiwan

38  
39 <sup>5</sup>Department of Exercise Health Science, National Taiwan University of Sport,  
40  
41 Taichung, Taiwan

42  
43 <sup>6</sup>Section of Infectious Diseases, Taipei City Hospital, Taipei City Government, Taipei, Taiwan

44  
45 <sup>7</sup>Department of Pediatrics; Division of Newborn Medicine, University of Mississippi  
46  
47 Medical Center, Mississippi, USA  
48  
49

50 **\*Correspondence to:**

51 **Yu-Yen Chen, MD., Ph.D.**

52  
53 Department of Ophthalmology, Taichung Veterans General Hospital, Taichung, Taiwan.  
54  
55 1650 Taiwan Boulevard Sect. 4, Taichung, Taiwan 40705  
56  
57  
58  
59  
60

1  
2  
3 Tel : 886-4-23592525

4 Fax : 886-4-23595046

5  
6 E-mail address: yuyenchen.phd@gmail.com

7  
8  
9 **Word count:** 2949

#### 10 **Author Contributors**

11 Conceptualization: YYC, YJL, YFY, YCS, and LWF; Formal analysis: YYC, YJL, CYW and LWF; Investigation:  
12 YYC, CYW, CYL, KHL and LWF; Methodology: YYC, YJL, YFY, and YCS; Validation: YYC, YFY, and KHL;  
13 Writing the original draft: YYC, and LWF.  
14

#### 15 **Funding statement**

16 This research received no specific grant from any funding agency in the public, commercial or  
17 not-for-profit sectors.  
18

#### 19 **Competing interest**

20 None.  
21

#### 22 **Ethics approval**

23 This study has been approved by the institutional review board of National Yang-Ming University  
24 (2015A018).  
25

#### 26 **Data sharing statement**

27 Data are available from the National Health Insurance Research Database (NHIRD) published by  
28 Taiwan National Health Insurance (NHI) Bureau. The data utilized in this study cannot be made  
29 available in the manuscript, the supplemental files, or in a public repository due to the Personal  
30 Information Protection Act executed by Taiwan's government, starting from 2012. Requests for data  
31 can be sent as a formal proposal to the NHIRD (<http://nhird.nhri.org.tw>) or by email to  
32 wt.gro.irhn@drihn.  
33  
34  
35  
36  
37  
38  
39  
40  
41  
42  
43  
44  
45  
46  
47  
48  
49  
50  
51  
52  
53  
54  
55  
56  
57  
58  
59  
60

# The Association between Normal Tension Glaucoma and the Risk of Alzheimer's Disease: A Nationwide Population-based Cohort study in Taiwan

## Abstract

**Objectives:** To investigate a possible association between normal tension glaucoma (NTG) and an increased risk of developing Alzheimer's disease (AD).

**Design:** Retrospective cohort study.

**Setting:** NTG group and the comparison group were retrieved from the whole population of the Taiwan National Health Insurance Research Database (NHIRD) from January 1, 2001, to December 31, 2013.

**Participants:** A total of 15,317 subjects with NTG were enrolled in the NTG group, and 61,268 age- and gender-matched subjects without glaucoma were enrolled in the comparison group.

**Primary and secondary outcome measures:** Kaplan-Meier curves were generated to compare the cumulative hazard of AD between the two groups. A multivariable Cox regression analysis was used to estimate the adjusted hazard ratios (HRs) of AD, adjusted for diabetes, hypertension, hyperlipidemia, coronary artery disease, and stroke. Furthermore, risks factors for developing AD among the NTG group were investigated.

**Results:** The mean age of the cohort was 62.1±12.5 years. NTG patients had significantly higher proportions of diabetes, hypertension, hyperlipidemia, coronary artery disease, and stroke than the comparisons. NTG patients had a significantly

1  
2  
3 higher cumulative hazard for AD than the comparisons ( $p < 0.0001$ ). In the  
4  
5 multivariable Cox regression after adjustment for confounders, the NTG group had a  
6  
7 significantly higher risk of AD (adjusted HR=1.52; 95% CI: 1.41 to 1.63). Moreover, in  
8  
9 the NTG group, when we compared the effects of different types of glaucoma eye  
10  
11 drops, none of the eye drops used were significant risk factors or protective factors  
12  
13 for AD.  
14

15  
16 **Conclusions:** People with NTG are at a significantly greater risk of developing AD  
17  
18 compared with individuals without glaucoma. Among NTG patients, none of the  
19  
20 glaucoma eye drops used significantly changed the risk of subsequent AD.  
21  
22

23  
24  
25 Keywords: normal tension glaucoma, Alzheimer's disease, risk factors, National  
26  
27 Health Insurance Research Database, cohort study  
28  
29

## 30 31 **Article Summary**

### 32 33 34 Strengths and limitations of this study

- 35  
36 ● The study utilized the comprehensive, whole national population database with  
37  
38 a long study period to investigate the relationship between normal tension  
39  
40 glaucoma and Alzheimer's disease.
- 41  
42 ● The cohort study design and survival analysis would elucidate the association  
43  
44 between normal tension glaucoma and subsequent risk of developing  
45  
46 Alzheimer's disease.
- 47  
48 ● Possible confounders were adjusted in the Cox regression to derive the more  
49  
50 real correlation between normal tension glaucoma and Alzheimer's disease.  
51  
52  
53  
54  
55  
56  
57  
58  
59  
60

## Introduction

Glaucoma is a chronic, progressive disease with characteristics of retinal ganglion cell loss, retinal nerve fiber layer (RNFL) thinning, and optic nerve atrophy.<sup>1-3</sup> Elevated intraocular pressure (IOP) plays an important role in the development of glaucomatous optic neuropathy. However, 30 to 92 percent of primary open-angle glaucoma (POAG) have IOP within the normal range and are classified as normal tension glaucoma (NTG).<sup>2, 4-7</sup> NTG occurs because of a fragile optic nerve that can be damaged despite a normal IOP, or because of mechanisms other than an elevated IOP (e.g., insufficient ocular perfusion pressure or autonomic dysfunction).<sup>8-13</sup> Without treatment, NTG leads to optic nerve atrophy, progressive visual field loss and even blindness. The mainstay treatment for NTG, similar to the therapy for other types of glaucoma, is aimed at reducing IOP with glaucoma eye drops.

Alzheimer's disease (AD) is the most common form of dementia that is characterized by a progressive loss of memory and cognition and changes in personalities and behavior, as well as by an impaired ability to perform daily activities.<sup>14-15</sup> In the brains of AD patients, amyloid plaques and neurofibrillary tangles (aggregation of abnormal tau proteins) lead to gross atrophy of the brain.<sup>15</sup>

NTG and AD have common features. Both of them are chronic, progressive neurodegenerative diseases with an age-related and female-predominant incidence.<sup>16</sup> In structural and pathological studies, AD patients exhibit RGC loss and RNFL thinning, similar to NTG patients.<sup>17-20</sup> In genetic studies, the epsilon 4 allele of apolipoprotein E (APOE), which is a risk factor for late-onset AD, has been observed in the pathogenesis of NTG.<sup>21</sup> The optineurin gene has also been found to be

1  
2  
3 associated with both AD and NTG.<sup>22-23</sup> In addition, in clinical, cross-sectional studies,  
4  
5 Bayer and Tamura et al. have found an increased prevalence of glaucoma in AD  
6  
7 patients.<sup>24-26</sup> All of these may imply that glaucoma and AD share similar  
8  
9 pathophysiological or underlying mechanisms.  
10

11  
12 However, population-based cohort studies evaluating the association between  
13  
14 glaucoma and AD have revealed inconsistent findings. The  
15  
16 Three-City-Bordeaux-Alienor study conducted in France showed that open-angle  
17  
18 glaucoma (OAG) patients were four times more likely to develop dementia during  
19  
20 the 3-year period.<sup>27</sup> In a Taiwan registry study, Lin et al. also found a significantly  
21  
22 higher risk of developing AD among the POAG patients.<sup>28</sup> In contrast, there was no  
23  
24 increased risk of developing AD among the NTG patients in a Danish registry study  
25  
26 and among the POAG patients in a population-based study in Sweden.<sup>29-30</sup> The  
27  
28 discrepancies may be due to the insufficient statistical power, non-equivalent study  
29  
30 designs, and different diagnostic criteria.  
31  
32

33  
34 The objective of our study was to investigate whether patients with NTG have a  
35  
36 higher risk of developing AD than controls using the National Health Insurance  
37  
38 Research Database (NHIRD) in Taiwan. We utilized the whole population database,  
39  
40 therefore, had large numbers of patients and a high level of statistical power. In  
41  
42 addition, the NHIRD adopted the International Classification of Diseases, Ninth  
43  
44 Revision, Clinical Modification (ICD-9-CM) codes, which are generally accepted  
45  
46 worldwide. Thus, our results can be clearly interpreted and compared to further  
47  
48 studies in other countries.  
49  
50  
51  
52  
53  
54  
55  
56  
57  
58  
59  
60



## Materials and Methods

### Data source

The National Health Insurance (NHI) program of Taiwan covers the healthcare services of greater than 99% of Taiwan's 23 million residents. The NHIRD is maintained by the National Health Research Institutes of Taiwan and includes inpatient and outpatient medical benefit claims. In NHIRD, the diagnoses were accurate and were verified by the National Health Administration (NHA). The NHA not only checks the consistencies between the claimed data and the charts but also makes sure the patient received a standard protocol of examinations to confirm the diagnoses. To ensure confidentiality, the identification of all patients in the database was encrypted prior to releasing data for research purposes. Therefore, according to the rules of the Institutional Review Board, written informed consent was waived. Based on the healthcare claims of the entire population, we sought to compare the hazard of AD in subjects with and without NTG during the 13-year period. This study was approved by the ethical committee of Yang-Ming University Hospital (2015A018).

### Patient involvement

Patients were not directly involved in the design of this study.

### Inclusion and exclusion criteria

Using the Taiwan NHIRD from 1996 to 2013, we performed a retrospective cohort study. We first selected patients with NTG (ICD-9-CM codes 365.12) from January 1, 2001, to December 31, 2013. Patients with NTG diagnoses from January 1, 1996, to December 31, 2000, were excluded to ensure that our NTG patients were newly diagnosed. The date of the first NTG claim was defined as the index date. Those who had never received a diagnosis of glaucoma were randomly selected as a

1  
2  
3 comparison group at a ratio of 1:4 and matched with the NTG group on age, gender,  
4 and index year (the year of the index date or enrollment). The two groups were  
5 followed up to see whether they developed subsequent AD. Follow-up time was  
6 calculated from the index date (enrollment date) to the date of AD diagnosis, death,  
7 or the end of 2013, whichever occurred first. The diagnosis of AD (ICD-9-CM codes:  
8 331.0) was confirmed by neurologists or psychiatrists through a well-acknowledged,  
9 standard diagnostic protocol. Subjects who received a diagnosis of AD or dementia  
10 before the index date or enrollment were excluded to ensure that the occurrence of  
11 AD was newly diagnosed.  
12  
13  
14  
15  
16  
17  
18  
19  
20  
21  
22  
23

### 24 **Statistical analysis**

25  
26 After investigating the two groups descriptively by age, gender, and  
27 comorbidities, the group differences were analyzed by the two-sample t-test (for  
28 continuous variables) and chi-square test (for categorical variables). Survival analysis  
29 using the Kaplan-Meier method with the log-rank test was applied to describe and  
30 compare the cumulative incidence curves of AD. A Cox proportional hazard model  
31 was used to estimate the hazard ratio (HR) for the occurrence of AD according to  
32 each variable in the univariate and multivariate analyses. Variables included in the  
33 regression analysis were age, gender and comorbidities, including diabetes,  
34 hypertension, hyperlipidemia, coronary artery disease, and stroke. Comorbidities  
35 were regarded as time-dependent covariates.  
36  
37  
38  
39  
40  
41  
42  
43  
44  
45  
46

47 We additionally performed stratified analyses according to age, in order to  
48 evaluate the risk factors for AD among different age subgroups. Then, using Cox  
49 proportional hazard model, we also explored the relationship between high-tension  
50 glaucoma (HTG) and AD, as well as the relationship between NTG and all  
51 dementia/dementia other than AD.  
52  
53  
54  
55  
56  
57  
58  
59  
60

1  
2  
3 Subsequently, we focused on the NTG group. The Cox regression was used to  
4 identify the risk factors associated with AD among NTG patients. Variables included  
5 for analysis were age, gender, comorbidities, and different types of glaucoma eye  
6 drops. Glaucoma eye drops were identified and classified by the National Drug Code  
7 and the Anatomic Therapeutic Chemical (ATC) code. According to the classification  
8 system, types of glaucoma eye drops include  $\alpha$ -agonists, parasympathomimetics  
9 (pilocarpine), carbonic anhydrase inhibitors,  $\beta$ -blockers, prostaglandin analogs, and  
10 fixed combinations. All statistical operations were performed using SAS statistical  
11 package, version 9.2 (SAS Institute, Cary, NC, USA).  
12  
13  
14  
15  
16  
17  
18  
19  
20  
21  
22  
23  
24  
25  
26  
27  
28  
29  
30  
31  
32  
33  
34  
35  
36  
37  
38  
39  
40  
41  
42  
43  
44  
45  
46  
47  
48  
49  
50  
51  
52  
53  
54  
55  
56  
57  
58  
59  
60

## Results

### Demographic characteristics of the study sample

A total of 15,317 NTG patients and 61,268 matched controls were enrolled in the study. Table 1 displays the demographics of the two groups. The mean age in both groups was 62.1 years. The NTG group had a significantly higher proportion of diabetes, hypertension, hyperlipidemia, coronary artery disease, and stroke than the comparison group. During the 13-year study period, the cumulative incidence of AD was significantly higher in the NTG group (1023/15317; 6.7%) than in the comparison group (2574/61268; 4.2%). Age of AD onset was  $73.8 \pm 8.1$  years.

**Table 1. Characteristics of the study subjects**

| Variable                                                | NTG group<br><i>n</i> =15317 | Comparison group<br><i>n</i> = 61268 | <i>p</i> -value |
|---------------------------------------------------------|------------------------------|--------------------------------------|-----------------|
|                                                         | <i>n</i> (%)                 | <i>n</i> (%)                         |                 |
| <b>Age, year, (mean±SD)</b>                             | 62.1±12.5                    | 62.1±12.5                            | 1.000           |
| <b>Age, categorical</b>                                 |                              |                                      | 1.000           |
| <55                                                     | 4778 (31.2)                  | 19112 (31.2)                         |                 |
| 55-65                                                   | 3889 (25.4)                  | 15556 (25.4)                         |                 |
| 65-75                                                   | 3627 (23.7)                  | 14508 (23.7)                         |                 |
| ≥75                                                     | 3023 (19.7)                  | 12092 (19.7)                         |                 |
| <b>Gender</b>                                           |                              |                                      | 1.000           |
| Male                                                    | 8372 (54.7)                  | 33488 (54.7)                         |                 |
| Female                                                  | 6945 (45.3)                  | 27780 (45.3)                         |                 |
| <b>Comorbidities</b>                                    |                              |                                      |                 |
| Diabetes                                                | 5110 (33.4)                  | 15671 (25.6)                         | <0.0001         |
| Hypertension                                            | 9148 (59.7)                  | 32790 (53.5)                         | <0.0001         |
| Hyperlipidemia                                          | 7590 (49.6)                  | 21628 (35.3)                         | <0.0001         |
| Coronary artery disease                                 | 5627 (36.7)                  | 16323 (26.6)                         | <0.0001         |
| Stroke                                                  | 1572 (10.3)                  | 6518 (10.6)                          | 0.18            |
| <b>Follow-up period, year<br/>(mean±SD)</b>             | 4.92±3.29                    | 4.96±3.27                            | 0.18            |
| <b>Occurrence of AD during<br/>the follow-up period</b> | 1023 (6.7)                   | 2574 (4.2)                           | <0.0001         |

NTG indicates normal tension glaucoma

### Cumulative hazard curves by the Kaplan-Meier method

Figure 1 illustrates the cumulative hazard curves for AD in the NTG group and the comparison group. A log-rank test revealed a statistically significant difference between the hazard curves of the two groups (*p*-value < 0.0001).

### Univariate and multivariate analyses by the Cox regression model

The unadjusted HR for AD was 1.66 times greater in the NTG group than in the comparison group (95% CI: 1.55-1.79) (Table 2). After adjusting for covariates, the

1  
2  
3 significantly greater hazard ratio for AD in the NTG group remained (adjusted HR=  
4 1.52; 95% CI: 1.41-1.63). Age was a significant risk factor for AD in both the  
5 univariate and multivariate analyses. The adjusted HR for AD in patients over 75  
6 years old reached 38.85 when compared with those patients younger than 55 years  
7 old. Males were less likely to develop AD than females (adjusted HR = 0.92; 95% CI:  
8 0.86-0.98). In the univariate analysis, patients with diabetes, hypertension,  
9 hyperlipidemia, coronary artery disease, or stroke had a significantly higher risk of  
10 developing AD. After adjustment for the covariates, only stroke remained a  
11 significant risk factor for AD (adjusted HR = 1.73; 95% CI: 1.61-1.87). In  
12 supplementary Table 1, subgroup analyses were also presented among individuals  
13 with older and younger age separately. Among subjects younger than 65, the  
14 adjusted HR for AD was 1.98 times greater in the NTG group than in the comparison  
15 group (95% CI: 1.63-2.42); the other independent, significant risk factors for AD were  
16 female and stroke. Among subjects older than 65, in addition to these risk factors,  
17 diabetes also significantly increased the risk for AD (adjusted HR=1.02; 95% CI:  
18 1.01-1.12).  
19  
20  
21  
22  
23  
24  
25  
26  
27  
28  
29  
30  
31  
32  
33  
34  
35  
36  
37  
38  
39  
40  
41  
42  
43  
44  
45  
46  
47  
48  
49  
50  
51  
52  
53  
54  
55  
56  
57  
58  
59  
60

**Table 2. Analysis of risk factors for Alzheimer's disease in patients with and without normal tension glaucoma**

| Predictive variables            | Univariate analysis       |                | Multivariate analysis   |                |
|---------------------------------|---------------------------|----------------|-------------------------|----------------|
|                                 | Unadjusted HR<br>(95% CI) | <i>P</i> value | Adjusted HR<br>(95% CI) | <i>P</i> value |
| <b>NTG</b> (Yes vs. No)         | 1.66 (1.55–1.79)          | <0.0001        | 1.52 (1.41–1.63)        | <0.0001        |
| <b>Age</b>                      |                           |                |                         |                |
| <55                             | Reference                 |                | Reference               |                |
| 55-65                           | 5.40 (4.30–6.78)          | <0.0001        | 4.97 (3.95–6.24)        | 0.0002         |
| 65-75                           | 20.25 (16.45–24.94)       | <0.0001        | 17.33 (14.02–21.42)     | <0.0001        |
| ≥75                             | 47.85 (38.92–58.82)       | <0.0001        | 38.85 (31.43–48.02)     | <0.0001        |
| <b>Gender</b> (Male vs. Female) | 0.81 (0.76–0.87)          | <0.0001        | 0.92 (0.86–0.98)        | 0.01           |
| <b>Comorbidities</b>            |                           |                |                         |                |
| Diabetes                        | 1.56 (1.45–1.66)          | <0.0001        | 1.05 (0.98–1.13)        | 0.20           |
| Hypertension                    | 2.98 (2.74–3.23)          | <0.0001        | 1.07 (0.97–1.17)        | 0.17           |
| Hyperlipidemia                  | 1.30 (1.21–1.39)          | <0.0001        | 1.01 (0.94–1.09)        | 0.79           |
| Coronary artery disease         | 2.27 (2.13–2.42)          | <0.0001        | 1.06 (0.99–1.14)        | 0.10           |
| Stroke                          | 3.39 (3.16–3.64)          | <0.0001        | 1.73 (1.61–1.87)        | <0.0001        |

NTG indicates normal tension glaucoma; HR indicates hazard ratio; CI indicates confidence interval; In the multivariate analysis, all the other variables listed in the table were included for adjustment.

Regarding the association between HTG and AD, the HR was non-significant (adjusted HR=1.12; 95% CI: 0.89–1.36). In Table 3, the relationship between NTG and dementia other than AD was also non-significant (adjusted HR=1.21; 95% CI: 0.90–1.49). However, diabetes significantly increased the risk for dementia other than AD (adjusted HR=2.16; 95% CI: 2.03–2.26).

**Table 3. Analyses of risk factors for all dementia and dementia other than Alzheimer's disease**

| Predictive variables | Outcome variables       |                 |                         |                 |
|----------------------|-------------------------|-----------------|-------------------------|-----------------|
|                      | All dementia            |                 | Dementia other than AD  |                 |
|                      | Adjusted HR<br>(95% CI) | <i>p</i> -value | Adjusted HR<br>(95% CI) | <i>p</i> -value |
| NTG (Yes vs. No)     | 1.39(1.25-1.46)         | <0.0001         | 1.21(0.90-1.49)         | 0.25            |
| Diabetes             | 1.51(1.47-1.54)         | <0.0001         | 2.16(2.03-2.26)         | <0.0001         |

HR indicates hazard ratio; CI indicates confidence interval; AD indicates Alzheimer's disease;

NTG indicates normal tension glaucoma; Variables included in the multivariate cox regression:

NTG, age, gender, diabetes, hyperlipidemia, coronary artery disease, stroke.

### Risk factors for AD among NTG patients

Table 4 displays the risk factors for AD among NTG patients. Older age, female gender, and stroke significantly increased the risk of developing AD among NTG patients in univariate as well as multivariate cox regression analyses. Moreover, when we compared the effects of different types of glaucoma eye drops, none of them were significant risk factors or protective factors for AD.



**Table 4. Analysis of risk factors for AD among patients with normal tension glaucoma**

| Predictive variables                          | Univariate analysis       |                 | Multivariate analysis   |                 |
|-----------------------------------------------|---------------------------|-----------------|-------------------------|-----------------|
|                                               | Unadjusted HR<br>(95% CI) | <i>p</i> -value | Adjusted HR<br>(95% CI) | <i>p</i> -value |
| <b>Age</b>                                    |                           |                 |                         |                 |
| <55                                           | Reference                 |                 | Reference               |                 |
| 55-65                                         | 5.14 (3.48-7.59)          | <0.0001         | 4.74 (3.20-7.02)        | <0.0001         |
| 65-75                                         | 14.65 (10.20-21.04)       | <0.0001         | 12.83 (8.85-18.60)      | <0.0001         |
| ≥75                                           | 34.06 (23.83-48.68)       | <0.0001         | 29.01 (20.04-42.00)     | <0.0001         |
| <b>Gender (Male vs. Female)</b>               | 0.93 (0.83–1.06)          | 0.28            | 0.81 (0.71-0.92)        | 0.0009          |
| <b>Comorbidities</b>                          |                           |                 |                         |                 |
| Diabetes                                      | 1.36 (1.20-1.54)          | <0.0001         | 1.01 (0.88-1.15)        | 0.91            |
| Hypertension                                  | 2.99 (2.54–3.52)          | <0.0001         | 1.11 (0.93-1.32)        | 0.27            |
| Hyperlipidemia                                | 1.21 (1.07-1.37)          | 0.002           | 1.08 (0.95-1.23)        | 0.23            |
| Coronary artery disease                       | 2.21 (1.95-2.50)          | <0.0001         | 1.14 (0.99-1.30)        | 0.06            |
| Stroke                                        | 2.55 (2.21–2.94)          | <0.0001         | 1.38 (1.19-1.60)        | <0.0001         |
| <b>Types of glaucoma eye drops</b>            |                           |                 |                         |                 |
| α-agonist (Yes vs. No)                        | 1.42 (1.20-1.69)          | <0.0001         | 0.93 (0.82-1.06)        | 0.25            |
| Carbonic anhydrase inhibitors<br>(Yes vs. No) | 0.80 (0.61-1.04)          | 0.09            | 0.89 (0.74-1.06)        | 0.19            |
| β-blocker (Yes vs. No)                        | 1.19 (0.83-1.69)          | 0.34            | 0.85 (0.70-1.04)        | 0.12            |
| Parasympathomimetics<br>(pilocarpine)         | 1.26 (0.52-3.02)          | 0.61            | 0.96 (0.68-1.36)        | 0.83            |
| Prostaglandin analogs (Yes<br>vs. No)         | 1.03 (0.88-1.21)          | 0.72            | 1.07 (0.93-1.23)        | 0.37            |

HR indicates hazard ratio; CI indicates confidence interval; AC indicates angle closure. In the multivariate analysis, all the other variables listed in the table were included for adjustment.

## Discussion

We conducted a 13-year cohort study on population-based data from the Taiwan NHIRD. Compared with those without glaucoma, patients with NTG had a significantly higher risk (HR = 1.52) of developing AD after adjustment for age, gender, and comorbidities. Among NTG patients, older age, female gender, and stroke were significant risk factors for developing AD. However, the types of glaucoma eye drops were not risk factors or protective factors for AD among NTG patients.

Both NTG and HTG belong to POAG. They present a continuum of POAG, in which the underlying mechanism shifts from predominantly elevated IOP in HTG to hemodynamic changes in NTG. Lee et al. conducted a cross-sectional study in South Korea and found that NTG patients had a significantly higher prevalence of hypertension, hyperlipidemia, ischemic heart disease, and metabolic syndrome.<sup>31</sup> These findings are compatible with our findings in Table 1. Compared with non-NTG patients, we also found that NTG patients tended to be older and female predominant. These findings are consistent with the previous literature.<sup>16</sup>

Previous studies regarding the relationship between glaucoma and AD have mostly investigated the association between POAG and AD.<sup>27-28, 32-34</sup> Nevertheless, POAG includes NTG and HTG, which are distinctive disease entities. NTG has different features compared to HTG, such as IOP-independent mechanisms and characteristic patterns of structural/functional damage.<sup>31, 35</sup> Therefore, it is not clear enough to regard NTG and HTG as one to evaluate the subsequent risk of AD. One strength of our study is that we specified the association between NTG and AD. To the best of our knowledge, only one previous population-based study focused on the relationship between NTG and AD.<sup>29</sup> Bach-Holm et al. tracked 69 NTG patients in

1  
2  
3 Denmark for a mean follow-up period of 12.7 years and did not find any significantly  
4 higher risk of developing dementia/AD compared with the general population. In  
5 fact, none of those 69 NTG patients subsequently developed AD. Statistically, the  
6 case numbers were too small to perform analyses effectively. It is another strength  
7 of our study that we included over 15,000 NTG patients from our nationwide  
8 database. Thus, we have a higher statistical power to draw convincing conclusions.  
9

10  
11  
12 Another strength of our study is the adjustment for possible confounders in the  
13 Cox regression. Table 2 shows that the unadjusted HR for AD is 1.66 (95% CI: 1.55 to  
14 1.79) in the NTG group compared with the comparison group. Age, female gender,  
15 and vascular/metabolic comorbidities have been reported to be risk factors of both  
16 NTG and AD.<sup>16, 31, 36-37</sup> thus, these should be adjusted for as confounders to address  
17 the association between NTG and AD. Due to the completeness of our database, we  
18 obtained inpatient and outpatient medical records of the whole population. After  
19 adjustment for confounders, the association between NTG and AD was still  
20 significant (HR= 1.52; 95% CI: 1.41 to 1.63), providing evidence that the significant  
21 association between NTG and AD is a real phenomenon.  
22  
23

24  
25  
26 Another strength is that we concentrated on the NTG group to investigate the  
27 risk factors for AD. Table 4 shows that among NTG patients, age, female gender, and  
28 stroke significantly increased the risk of subsequent AD. To the best of our  
29 knowledge, this is the first study to find factors that were associated with an  
30 increased risk of subsequent AD among NTG patients. This finding reminds us to be  
31 alert when we identify these high-risk factors among patients with NTG.  
32  
33

34  
35  
36 Previous animal and in vitro studies have revealed that Betaxolol and  
37 Brimonidine eye drops are neuroprotective.<sup>38-42</sup> However, in our study, none of the  
38 glaucoma eye drops were identified as risk factors or protective factors for AD  
39 among the NTG patients. Further studies are warranted to investigate the issue.  
40  
41  
42  
43  
44  
45  
46  
47  
48  
49  
50  
51  
52  
53  
54  
55  
56  
57  
58  
59  
60

1  
2  
3  
4  
5  
6  
7  
8  
9  
10  
11  
12  
13  
14  
15  
16  
17  
18  
19  
20  
21  
22  
23  
24  
25  
26  
27  
28  
29  
30  
31  
32  
33  
34  
35  
36  
37  
38  
39  
40  
41  
42  
43  
44  
45  
46  
47  
48  
49  
50  
51  
52  
53  
54  
55  
56  
57  
58  
59  
60

In our study, Table 3 shows diabetes is a significant risk factor for dementia other than AD (mostly are vascular dementia). This finding is consistent with the previous hospital-based study in Taiwan, which revealed a significant association between diabetes and vascular dementia.<sup>43</sup> On the other hand, our study shows diabetes is not a significant risk factor for AD among all the enrolled subjects (adjusted HR=1.05, 95% CI: 0.98-1.13). However, previous studies found diabetes to be a significant risk factor for AD among the elderly.<sup>44-46</sup> To unravel the possible interaction effect of age and diabetes on AD, we performed the cox regression in subgroups according to younger age and older age. Among those over 65 years, diabetes significantly increased the risk of AD, which was compatible with the results of previous studies.<sup>44-46</sup> Even so, the HR in our study (1.02) was lower than the previous population-based study in Taiwan, which had the study period from 1997 to 2007 and revealed a HR of 1.76 (95% 1.50-2.07).<sup>47</sup> The weaker association might result from the better diabetes care in recent years.<sup>48</sup> Since poor-controlled fasting plasma glucose and HbA<sub>1c</sub> are significant predictors of AD,<sup>49</sup> the better diabetes care might possibly reduce the development of AD. Our study had a more recent study period (from 2001-2013), therefore the association between diabetes and AD is weaker. The postulation should be investigated in future studies.

In our investigation regarding the association between HTG and AD, as well as the relationship between NTG and dementia other than AD, the adjusted HR is 1.12 (95% CI: 0.89-1.36) and 1.21 (95% CI: 0.90-1.49), respectively. Thus, the significantly positive association was specifically exhibited between NTG and AD. One of the possible explanation is the common pathogenesis of neurotoxic substances in NTG and AD. AD is characterized by abnormal hyperphosphorylated tau and  $\beta$ -amyloid in the brain. These abnormal protein are also related to retinal ganglion cell death in

1  
2  
3 glaucoma.<sup>50</sup> Another pathological explanation may be the low intracranial pressure  
4 (ICP) in both NTG and AD. Low ICP leads to cerebrospinal fluid (CSF) circulatory  
5 failure and accumulation of neurotoxins in CSF as well as along the optic nerve, thus  
6 playing a role in NTG and AD.<sup>51-54</sup>  
7  
8  
9  
10

11 From our study, we cannot conclude that NTG or its treatment causes AD,  
12 because the association of the two diseases may result from their common  
13 pathogenesis. In Figure 1, the two lines converge from the outset without any latent  
14 period, suggesting the same risk factors that influence NTG also influence AD.  
15 Further studies are warranted to elucidate the explanations of relationship between  
16 NTG and AD.  
17  
18  
19  
20  
21  
22  
23

24 A limitation of our study is that NHIRD does not provide information regarding  
25 the severity of visual field defects or visual acuity. Therefore, we could not evaluate  
26 whether the risk of AD was positively correlated with the severity of NTG or visual  
27 impairment. Future studies including chart review will be conducted to consider  
28 these factors. Another limitation is NTG or AD may be under-diagnosed in database  
29 studies. Thus, those with NTG may have more healthcare visits, leading to a higher  
30 chance of being diagnosed AD. Fortunately, in our healthcare system, NHI covers the  
31 fee of the comprehensive, regular health checkup of all beneficiaries. Individuals  
32 over 40 years are compelled to receive health checkup once per 3 years and those  
33 over 65 years should have once per year. The high accessibility of healthcare ensures  
34 the similar chance of diagnosis in NTGs and comparisons if they had AD. It is proved  
35 by the similar frequencies of healthcare professionals contacts (excluding  
36 ophthalmologists contacts) in NTG and control subjects ( $10.2 \pm 7.6$  vs.  $10.0 \pm 7.7$  times  
37 per year;  $p=0.08$ ). Even if NTG and AD are under-diagnosed, the misclassification is  
38 non-differential and causes toward-the-null bias.  
39  
40  
41  
42  
43  
44  
45  
46  
47  
48  
49  
50  
51  
52  
53  
54  
55

56 The findings from our study have both clinical and public health implications.  
57  
58  
59  
60

1  
2  
3 Clinically, when treating NTG patients, ophthalmologists need to focus not only on  
4 the medical aspects of NTG but also on changes in cognitive function or memory.  
5  
6 NTG patients at a higher risk for AD, such as older patients, female patients, and  
7  
8 patients with stroke, should be referred to a neurologist or psychiatrist if early signs  
9  
10 of AD become apparent. From a public health perspective, policy makers are  
11  
12 encouraged to enforce screening for AD risk in patients with NTG and to provide  
13  
14 more substantial and integrated care.  
15  
16  
17  
18  
19  
20  
21  
22  
23  
24  
25  
26  
27  
28  
29  
30  
31  
32  
33  
34  
35  
36  
37  
38  
39  
40  
41  
42  
43  
44  
45  
46  
47  
48  
49  
50  
51  
52  
53  
54  
55  
56  
57  
58  
59  
60

## References

1. Gordon MO, Beiser JA, Brandt JD, et al. The Ocular Hypertension Treatment Study: baseline factors that predict the onset of primary open-angle glaucoma. *Archives of ophthalmology* 2002;120(6):714-20.
2. Sommer A, Tielsch JM, Katz J, et al. Relationship between intraocular pressure and primary open angle glaucoma among white and black Americans. The Baltimore Eye Survey. *Archives of ophthalmology* 1991;109(8):1090-5.
3. Weih LM, Nanjan M, McCarty CA, et al. Prevalence and predictors of open-angle glaucoma: results from the visual impairment project. *Ophthalmology* 2001;108(11):1966-72.
4. Bonomi L, Marchini G, Marraffa M, et al. Prevalence of glaucoma and intraocular pressure distribution in a defined population. The Egna-Neumarkt Study. *Ophthalmology* 1998;105(2):209-15.
5. Cho HK, Kee C. Population-based glaucoma prevalence studies in Asians. *Survey of ophthalmology* 2014;59(4):434-47.
6. Klein BE, Klein R, Sponsel WE, et al. Prevalence of glaucoma. The Beaver Dam Eye Study. *Ophthalmology* 1992;99(10):1499-504.
7. Rotchford AP, Johnson GJ. Glaucoma in Zulus: a population-based cross-sectional survey in a rural district in South Africa. *Archives of ophthalmology* 2002;120(4):471-8.
8. Caprioli J, Coleman AL. Blood pressure, perfusion pressure, and glaucoma. *Am J Ophthalmol* 2010;149(5):704-12.
9. Flammer J, Konieczka K, Flammer AJ. The primary vascular dysregulation syndrome: implications for eye diseases. *The EPMA journal* 2013;4(1):14.
10. Mozaffarieh M, Flammer J. New insights in the pathogenesis and treatment of normal tension glaucoma. *Current opinion in pharmacology* 2013;13(1):43-9.
11. Park HY, Park SH, Park CK. Central visual field progression in normal-tension glaucoma patients with autonomic dysfunction. *Investigative ophthalmology & visual science* 2014;55(4):2557-63.
12. Siaudvytyte L, Januleviciene I, Daveckaite A, et al. Literature review and meta-analysis of translaminal pressure difference in open-angle glaucoma. *Eye* 2015;29(10):1242-50.
13. Mroczkowska S, Benavente-Perez A, Negi A, et al. Primary open-angle glaucoma vs normal-tension glaucoma: the vascular perspective. *JAMA ophthalmology* 2013;131(1):36-43.
14. Burns A, Iliffe S. Alzheimer's disease. *BMJ* 2009;338:b158.
15. Tiraboschi P, Hansen LA, Thal LJ, et al. The importance of neuritic plaques and

- 1  
2  
3 tangles to the development and evolution of AD. *Neurology*  
4 2004;62(11):1984-9.  
5  
6 16. Mallick J, Devi L, Malik PK, et al. Update on Normal Tension Glaucoma. *Journal of*  
7 *ophthalmic & vision research* 2016;11(2):204-8.  
8  
9 17. Berisha F, Feke GT, Trempe CL, et al. Retinal abnormalities in early Alzheimer's  
10 disease. *Investigative ophthalmology & visual science* 2007;48(5):2285-9.  
11  
12 18. Guo L, Duggan J, Cordeiro MF. Alzheimer's disease and retinal neurodegeneration.  
13 *Current Alzheimer research* 2010;7(1):3-14.  
14  
15 19. Kesler A, Vakhapova V, Korczyn AD, et al. Retinal thickness in patients with mild  
16 cognitive impairment and Alzheimer's disease. *Clinical neurology and*  
17 *neurosurgery* 2011;113(7):523-6.  
18  
19 20. Sadun AA, Bassi CJ. Optic nerve damage in Alzheimer's disease. *Ophthalmology*  
20 1990;97(1):9-17.  
21  
22 21. Vickers JC, Craig JE, Stankovich J, et al. The apolipoprotein epsilon4 gene is  
23 associated with elevated risk of normal tension glaucoma. *Molecular vision*  
24 2002;8:389-93.  
25  
26 22. Liu YH, Tian T. Hypothesis of optineurin as a new common risk factor in  
27 normal-tension glaucoma and Alzheimer's disease. *Medical hypotheses*  
28 2011;77(4):591-2.  
29  
30 23. Osawa T, Mizuno Y, Fujita Y, et al. Optineurin in neurodegenerative diseases.  
31 *Neuropathology : official journal of the Japanese Society of Neuropathology*  
32 2011;31(6):569-74.  
33  
34 24. Tamura H, Kawakami H, Kanamoto T, et al. High frequency of open-angle  
35 glaucoma in Japanese patients with Alzheimer's disease. *Journal of the*  
36 *neurological sciences* 2006;246(1-2):79-83.  
37  
38 25. Bayer AU, Ferrari F, Erb C. High occurrence rate of glaucoma among patients with  
39 Alzheimer's disease. *European neurology* 2002;47(3):165-8.  
40  
41 26. Bayer AU, Keller ON, Ferrari F, et al. Association of glaucoma with  
42 neurodegenerative diseases with apoptotic cell death: Alzheimer's disease  
43 and Parkinson's disease. *American Journal of Ophthalmology*  
44 2002;133(1):135-37.  
45  
46 27. Helmer C, Malet F, Rougier MB, et al. Is there a link between open-angle  
47 glaucoma and dementia? The Three-City-Alienor cohort. *Annals of neurology*  
48 2013;74(2):171-9.  
49  
50 28. Lin IC, Wang YH, Wang TJ, et al. Glaucoma, Alzheimer's disease, and Parkinson's  
51 disease: an 8-year population-based follow-up study. *PloS one*  
52 2014;9(9):e108938.  
53  
54 29. Bach-Holm D, Kessing SV, Mogensen U, et al. Normal tension glaucoma and  
55  
56  
57  
58  
59



- 1  
2  
3 Alzheimer disease: comorbidity? *Acta ophthalmologica* 2012;90(7):683-5.  
4  
5 30. Ekstrom C, Kilander L. Open-angle glaucoma and Alzheimer's disease: a  
6 population-based 30-year follow-up study. *Acta ophthalmologica*  
7 2017;95(2):e157-e58.  
8  
9 31. Lee SH, Kim GA, Lee W, et al. Vascular and metabolic comorbidities in open-angle  
10 glaucoma with low- and high-teen intraocular pressure: a cross-sectional  
11 study from South Korea. 2017;95(7):e564-e74.  
12  
13 32. Kessing LV, Lopez AG, Andersen PK, et al. No increased risk of developing  
14 Alzheimer disease in patients with glaucoma. *Journal of glaucoma*  
15 2007;16(1):47-51.  
16  
17 33. Ou Y, Grossman DS, Lee PP, et al. Glaucoma, Alzheimer disease and other  
18 dementia: a longitudinal analysis. *Ophthalmic epidemiology*  
19 2012;19(5):285-92.  
20  
21 34. Keenan TD, Goldacre R, Goldacre MJ. Associations between primary open angle  
22 glaucoma, Alzheimer's disease and vascular dementia: record linkage study.  
23 *The British journal of ophthalmology* 2015;99(4):524-7.  
24  
25 35. Kim KE, Park KH. Update on the Prevalence, Etiology, Diagnosis, and Monitoring  
26 of Normal-Tension Glaucoma. *Asia-Pacific journal of ophthalmology*  
27 *(Philadelphia, Pa)* 2016;5(1):23-31.  
28  
29 36. Hersi M, Irvine B, Gupta P, et al. Risk factors associated with the onset and  
30 progression of Alzheimer's disease: A systematic review of the evidence.  
31 *Neurotoxicology* 2017;61:143-87.  
32  
33 37. Stefanova E, Pavlovic A, Jovanovic Z, et al. Vascular risk factors in Alzheimer's  
34 disease - preliminary report. *Journal of the neurological sciences*  
35 2012;322(1-2):166-9.  
36  
37 38. Baptiste DC, Hartwick AT, Jollimore CA, et al. Comparison of the neuroprotective  
38 effects of adrenoceptor drugs in retinal cell culture and intact retina.  
39 *Investigative ophthalmology & visual science* 2002;43(8):2666-76.  
40  
41 39. Lee D, Kim KY, Noh YH, et al. Brimonidine blocks glutamate excitotoxicity-induced  
42 oxidative stress and preserves mitochondrial transcription factor a in ischemic  
43 retinal injury. *PLoS one* 2012;7(10):e47098.  
44  
45 40. Osborne NN, DeSantis L, Bae JH, et al. Topically applied betaxolol attenuates  
46 NMDA-induced toxicity to ganglion cells and the effects of ischaemia to the  
47 retina. *Experimental eye research* 1999;69(3):331-42.  
48  
49 41. Tatton W, Chen D, Chalmers-Redman R, et al. Hypothesis for a common basis for  
50 neuroprotection in glaucoma and Alzheimer's disease: anti-apoptosis by  
51 alpha-2-adrenergic receptor activation. *Survey of ophthalmology* 2003;48  
52 Suppl 1:S25-37.  
53  
54  
55  
56  
57  
58  
59

- 1  
2  
3 42. Wood JP, DeSantis L, Chao HM, et al. Topically applied betaxolol attenuates  
4 ischaemia-induced effects to the rat retina and stimulates BDNF mRNA.  
5 *Experimental eye research* 2001;72(1):79-86.  
6
- 7 43. Lin JC, Hsu WC, Hsu HP, et al. Risk factors for vascular dementia: a hospital-based  
8 study in Taiwan. *Acta Neurol Taiwan* 2007;16(1):22-6.  
9
- 10  
11 44. Ahtiluoto S, Polvikoski T, Peltonen M, et al. Diabetes, Alzheimer disease, and  
12 vascular dementia: a population-based neuropathologic study. *Neurology*  
13 2010;75(13):1195-202. doi: 10.1212/WNL.0b013e3181f4d7f8 [published  
14 Online First: 2010/08/27]  
15
- 16 45. Ohara T, Doi Y, Ninomiya T, et al. Glucose tolerance status and risk of dementia in  
17 the community: the Hisayama study. *Neurology* 2011;77(12):1126-34. doi:  
18 10.1212/WNL.0b013e31822f0435 [published Online First: 2011/09/21]  
19
- 20 46. Qiu C, Xu W, Winblad B, et al. Vascular risk profiles for dementia and Alzheimer's  
21 disease in very old people: a population-based longitudinal study. *Journal of*  
22 *Alzheimer's disease : JAD* 2010;20(1):293-300. doi: 10.3233/jad-2010-1361.  
23
- 24 47. Huang CC, Chung CM, Leu HB, et al. Diabetes mellitus and the risk of Alzheimer's  
25 disease: a nationwide population-based study. *PLoS One* 2014;9(1):e87095.  
26
- 27 48. Chang TJ, Jiang YD, Chang CH, et al. Accountability, utilization and providers for  
28 diabetes management in Taiwan, 2000-2009: an analysis of the National  
29 Health Insurance database. *J Formos Med Assoc* 2012;111(11):605-16.  
30
- 31 49. Li TC, Yang CP, Tseng ST, et al. Visit-to-Visit Variations in Fasting Plasma Glucose  
32 and HbA1c Associated With an Increased Risk of Alzheimer Disease: Taiwan  
33 Diabetes Study. *Diabetes Care* 2017;40(9):1210-17.  
34
- 35 50. Jain S, Aref AA. Senile Dementia and Glaucoma: Evidence for a Common Link.  
36 *Journal of ophthalmic & vision research* 2015;10(2):178-83. doi:  
37 10.4103/2008-322x.163766 [published Online First: 2015/10/02]  
38
- 39 51. Wostyn P, De Groot V, Van Dam D, et al. Senescent changes in cerebrospinal fluid  
40 circulatory physiology and their role in the pathogenesis of normal-tension  
41 glaucoma. *Am J Ophthalmol* 2013;156(1):5-14.e2. doi:  
42 10.1016/j.ajo.2013.03.003 [published Online First: 2013/04/24]  
43
- 44 52. Serot JM, Zmudka J, Jouanny P. A possible role for CSF turnover and choroid  
45 plexus in the pathogenesis of late onset Alzheimer's disease. *Journal of*  
46 *Alzheimer's disease : JAD* 2012;30(1):17-26. doi: 10.3233/jad-2012-111964  
47 [published Online First: 2012/02/22]  
48
- 49 53. Preston JE. Ageing choroid plexus-cerebrospinal fluid system. *Microscopy*  
50 *research and technique* 2001;52(1):31-7. doi:  
51 10.1002/1097-0029(20010101)52:1<31::aid-jemt5>3.0.co;2-t [published  
52  
53  
54  
55  
56  
57  
58  
59  
60

1  
2  
3  
4  
5  
6  
7  
8  
9  
10  
11  
12  
13  
14  
15  
16  
17  
18  
19  
20  
21  
22  
23  
24  
25  
26  
27  
28  
29  
30  
31  
32  
33  
34  
35  
36  
37  
38  
39  
40  
41  
42  
43  
44  
45  
46  
47  
48  
49  
50  
51  
52  
53  
54  
55  
56  
57  
58  
59  
60

Online First: 2001/01/03]

54. Silverberg GD, Mayo M, Saul T, et al. Alzheimer's disease, normal-pressure hydrocephalus, and senescent changes in CSF circulatory physiology: a hypothesis. *The Lancet Neurology* 2003;2(8):506-11. [published Online First: 2003/07/25]

For peer review only

## Figure Legends

**Fig. 1. Kaplan-Meier curves for Alzheimer's disease among NTG patients and the comparison group.** The black line represents the NTG group and the gray line represents the comparison group.

For peer review only



Fig. 1. Kaplan-Meier curves for Alzheimer's disease among NTG patients and the comparison group. The black line represents the NTG group and the gray line represents the comparison group.

135x120mm (300 x 300 DPI)

**Supplementary Table 1. Subgroup analysis of risk factors for Alzheimer's disease in patients with and without normal tension glaucoma, stratified by age**

| Predictive variables            | Age<65<br>(Total n=44165; AD n=447) |                | Age≥65<br>(Total n=32420; AD n=3150) |                |
|---------------------------------|-------------------------------------|----------------|--------------------------------------|----------------|
|                                 | Adjusted HR<br>(95% CI)             | <i>P</i> value | Adjusted HR<br>(95% CI)              | <i>P</i> value |
| <b>NTG</b> (Yes vs. No)         | 1.98 (1.63–2.42)                    | <0.0001        | 1.50 (1.39–1.63)                     | <0.0001        |
| <b>Gender</b> (Male vs. Female) | 0.68 (0.56–0.82)                    | <0.0001        | 0.93 (0.86–0.99)                     | 0.03           |
| <b>Comorbidities</b>            |                                     |                |                                      |                |
| Diabetes                        | 1.19 (0.96–1.47)                    | 0.12           | 1.02 (1.01–1.12)                     | 0.03           |
| Hypertension                    | 1.05 (0.84–1.31)                    | 0.69           | 1.09 (0.98–1.21)                     | 0.10           |
| Hyperlipidemia                  | 1.22 (0.93–1.59)                    | 0.15           | 1.01 (0.99–1.18)                     | 0.08           |
| Coronary artery disease         | 1.26 (0.94–1.65)                    | 0.12           | 1.07 (0.99–1.13)                     | 0.08           |
| Stroke                          | 4.19 (3.30–5.30)                    | <0.0001        | 1.73 (1.60–1.87)                     | <0.0001        |

NTG indicates normal tension glaucoma; n indicates numbers; AD indicates Alzheimer disease; HR indicates hazard ratio; CI indicates confidence interval; all the other variables listed in the table were included for adjustment.

**STROBE 2007 (v4) checklist of items to be included in reports of observational studies in epidemiology\***  
**Checklist for cohort, case-control, and cross-sectional studies (combined)**

| Section/Topic             | Item # | Recommendation                                                                                                                                                                                                                                                                                                                                                                                                                                                         | Reported on page # |
|---------------------------|--------|------------------------------------------------------------------------------------------------------------------------------------------------------------------------------------------------------------------------------------------------------------------------------------------------------------------------------------------------------------------------------------------------------------------------------------------------------------------------|--------------------|
| Title and abstract        | 1      | (a) Indicate the study's design with a commonly used term in the title or the abstract                                                                                                                                                                                                                                                                                                                                                                                 | 3                  |
|                           |        | (b) Provide in the abstract an informative and balanced summary of what was done and what was found                                                                                                                                                                                                                                                                                                                                                                    | 3-4                |
| <b>Introduction</b>       |        |                                                                                                                                                                                                                                                                                                                                                                                                                                                                        |                    |
| Background/rationale      | 2      | Explain the scientific background and rationale for the investigation being reported                                                                                                                                                                                                                                                                                                                                                                                   | 6-7                |
| Objectives                | 3      | State specific objectives, including any pre-specified hypotheses                                                                                                                                                                                                                                                                                                                                                                                                      | 7                  |
| <b>Methods</b>            |        |                                                                                                                                                                                                                                                                                                                                                                                                                                                                        |                    |
| Study design              | 4      | Present key elements of study design early in the paper                                                                                                                                                                                                                                                                                                                                                                                                                | 8                  |
| Setting                   | 5      | Describe the setting, locations, and relevant dates, including periods of recruitment, exposure, follow-up, and data collection                                                                                                                                                                                                                                                                                                                                        | 8                  |
| Participants              | 6      | (a) <i>Cohort study</i> —Give the eligibility criteria, and the sources and methods of selection of participants. Describe methods of follow-up<br><i>Case-control study</i> —Give the eligibility criteria, and the sources and methods of case ascertainment and control selection. Give the rationale for the choice of cases and controls<br><i>Cross-sectional study</i> —Give the eligibility criteria, and the sources and methods of selection of participants | 8-9                |
|                           |        | (b) <i>Cohort study</i> —For matched studies, give matching criteria and number of exposed and unexposed<br><i>Case-control study</i> —For matched studies, give matching criteria and the number of controls per case                                                                                                                                                                                                                                                 | 8                  |
| Variables                 | 7      | Clearly define all outcomes, exposures, predictors, potential confounders, and effect modifiers. Give diagnostic criteria, if applicable                                                                                                                                                                                                                                                                                                                               | 9                  |
| Data sources/ measurement | 8*     | For each variable of interest, give sources of data and details of methods of assessment (measurement). Describe comparability of assessment methods if there is more than one group                                                                                                                                                                                                                                                                                   | 8                  |
| Bias                      | 9      | Describe any efforts to address potential sources of bias                                                                                                                                                                                                                                                                                                                                                                                                              | 9                  |
| Study size                | 10     | Explain how the study size was arrived at                                                                                                                                                                                                                                                                                                                                                                                                                              | 9                  |
| Quantitative variables    | 11     | Explain how quantitative variables were handled in the analyses. If applicable, describe which groupings were chosen and why                                                                                                                                                                                                                                                                                                                                           | 9                  |
| Statistical methods       | 12     | (a) Describe all statistical methods, including those used to control for confounding                                                                                                                                                                                                                                                                                                                                                                                  | 9                  |
|                           |        | (b) Describe any methods used to examine subgroups and interactions                                                                                                                                                                                                                                                                                                                                                                                                    | 9                  |
|                           |        | (c) Explain how missing data were addressed                                                                                                                                                                                                                                                                                                                                                                                                                            | 9                  |
|                           |        | (d) <i>Cohort study</i> —If applicable, explain how loss to follow-up was addressed<br><i>Case-control study</i> —If applicable, explain how matching of cases and controls was addressed                                                                                                                                                                                                                                                                              | 8                  |

|                          |     |                                                                                                                                                                                                              |       |
|--------------------------|-----|--------------------------------------------------------------------------------------------------------------------------------------------------------------------------------------------------------------|-------|
|                          |     | <i>Cross-sectional study</i> —If applicable, describe analytical methods taking account of sampling strategy                                                                                                 |       |
|                          |     | (e) Describe any sensitivity analyses                                                                                                                                                                        | 9     |
| <b>Results</b>           |     |                                                                                                                                                                                                              |       |
| Participants             | 13* | (a) Report numbers of individuals at each stage of study—eg numbers potentially eligible, examined for eligibility, confirmed eligible, included in the study, completing follow-up, and analysed            | 10    |
|                          |     | (b) Give reasons for non-participation at each stage                                                                                                                                                         | 10    |
|                          |     | (c) Consider use of a flow diagram                                                                                                                                                                           | 10    |
| Descriptive data         | 14* | (a) Give characteristics of study participants (eg demographic, clinical, social) and information on exposures and potential confounders                                                                     | 10-11 |
|                          |     | (b) Indicate number of participants with missing data for each variable of interest                                                                                                                          | 11    |
|                          |     | (c) <i>Cohort study</i> —Summarise follow-up time (eg, average and total amount)                                                                                                                             | 11    |
| Outcome data             | 15* | <i>Cohort study</i> —Report numbers of outcome events or summary measures over time                                                                                                                          | 13    |
|                          |     | <i>Case-control study</i> —Report numbers in each exposure category, or summary measures of exposure                                                                                                         | NA    |
|                          |     | <i>Cross-sectional study</i> —Report numbers of outcome events or summary measures                                                                                                                           | NA    |
| Main results             | 16  | (a) Give unadjusted estimates and, if applicable, confounder-adjusted estimates and their precision (eg, 95% confidence interval). Make clear which confounders were adjusted for and why they were included | 11    |
|                          |     | (b) Report category boundaries when continuous variables were categorized                                                                                                                                    | 11    |
|                          |     | (c) If relevant, consider translating estimates of relative risk into absolute risk for a meaningful time period                                                                                             | NA    |
| Other analyses           | 17  | Report other analyses done—eg analyses of subgroups and interactions, and sensitivity analyses                                                                                                               | 14    |
| <b>Discussion</b>        |     |                                                                                                                                                                                                              |       |
| Key results              | 18  | Summarise key results with reference to study objectives                                                                                                                                                     | 15    |
| Limitations              | 19  | Discuss limitations of the study, taking into account sources of potential bias or imprecision. Discuss both direction and magnitude of any potential bias                                                   | 17    |
| Interpretation           | 20  | Give a cautious overall interpretation of results considering objectives, limitations, multiplicity of analyses, results from similar studies, and other relevant evidence                                   | 15-16 |
| Generalisability         | 21  | Discuss the generalisability (external validity) of the study results                                                                                                                                        | 17    |
| <b>Other information</b> |     |                                                                                                                                                                                                              |       |
| Funding                  | 22  | Give the source of funding and the role of the funders for the present study and, if applicable, for the original study on which the present article is based                                                | 2     |

\*Give information separately for cases and controls in case-control studies and, if applicable, for exposed and unexposed groups in cohort and cross-sectional studies.

**Note:** An Explanation and Elaboration article discusses each checklist item and gives methodological background and published examples of transparent reporting. The STROBE checklist is best used in conjunction with this article (freely available on the Web sites of PLoS Medicine at <http://www.plosmedicine.org/>, Annals of Internal Medicine at <http://www.annals.org/>, and Epidemiology at <http://www.epidem.com/>). Information on the STROBE Initiative is available at [www.strobe-statement.org](http://www.strobe-statement.org).
