# Supplementary material for: Association between normal tension glaucoma and the risk of Alzheimer’s disease: a nationwide population-based cohort study in Taiwan
Source: PubMed Central journal article supplement — BMJ Open. 2018 Nov 5;8(11):e022987. doi: 10.1136/bmjopen-2018-022987 (PMC6231573; doi:10.1136/bmjopen-2018-022987), 2018-11-05
Supplement: bmjopen-2018-022987supp001.pdf [file bmjopen-2018-022987supp001.pdf]

**Supplementary Table 1. Subgroup analysis of risk factors for Alzheimer’s disease in patients with and without normal tension glaucoma, stratified by age**

| Predictive variables            | Age<65<br>(Total n=44165; AD n=447) |                | Age≥65<br>(Total n=32420; AD n=3150) |                |
|---------------------------------|-------------------------------------|----------------|--------------------------------------|----------------|
|                                 | Adjusted HR<br>(95% CI)             | <i>P</i> value | Adjusted HR<br>(95% CI)              | <i>P</i> value |
| <b>NTG</b> (Yes vs. No)         | 1.98 (1.63–2.42)                    | <0.0001        | 1.50 (1.39–1.63)                     | <0.0001        |
| <b>Gender</b> (Male vs. Female) | 0.68 (0.56–0.82)                    | <0.0001        | 0.93 (0.86–0.99)                     | 0.03           |
| <b>Comorbidities</b>            |                                     |                |                                      |                |
| Diabetes                        | 1.19 (0.96-1.47)                    | 0.12           | 1.02 (1.01–1.12)                     | 0.03           |
| Hypertension                    | 1.05 (0.84–1.31)                    | 0.69           | 1.09 (0.98-1.21)                     | 0.10           |
| Hyperlipidemia                  | 1.22 (0.93-1.59)                    | 0.15           | 1.01 (0.99-1.18)                     | 0.08           |
| Coronary artery disease         | 1.26 (0.94-1.65)                    | 0.12           | 1.07 (0.99-1.13)                     | 0.08           |
| Stroke                          | 4.19 (3.30–5.30)                    | <0.0001        | 1.73 (1.60–1.87)                     | <0.0001        |

NTG indicates normal tension glaucoma; n indicates numbers; AD indicates Alzheimer disease; HR indicates hazard ratio; CI indicates confidence interval; all the other variables listed in the table were included for adjustment.
